1 **Continuous gene flow contributes to low global species abundance and distribution of a**  
2 **marine model diatom**

3

4

5 Achal Rastogi<sup>1</sup>, Anne-Flore Deton-Cabanillas<sup>1</sup>, Fabio Rocha Jimenez Vieira<sup>1</sup>, Alaguraj  
6 Veluchamy<sup>1,5</sup>, Catherine Cantrel<sup>1</sup>, Gaohong Wang<sup>2</sup>, Pieter Vanormelingen<sup>3</sup>, Chris Bowler<sup>1</sup>,  
7 Gwenael Piganeau<sup>4,5</sup>, Leila Tirichine<sup>1\*</sup> and Hanhua Hu<sup>2</sup>

8

9 <sup>1</sup>IBENS, Département de Biologie, Ecole Normale Supérieure, CNRS, Inserm, PSL Research  
10 University, F-75005, Paris, France

11

12 <sup>5</sup>Present Address: Biological and Environmental Sciences and Engineering Division, Center  
13 for Desert Agriculture, King Abdullah University of Science and Technology, Thuwal  
14 23955-6900, Saudi Arabia

15

16 <sup>2</sup>Key Laboratory of Algal Biology, Institute of Hydrobiology, Donghu south road, Wuchang  
17 district, Wuhan, Hubei Province, China

18

19 <sup>3</sup>Ghent University, Department of Biology, Research Group Protistology and Aquatic Ecology  
20 Krijgslaan 281/S8 9000 Gent, Belgium

21 <sup>4</sup>CNRS, UMR 7232, Observatoire Océanologique

22 <sup>5</sup>UPMC University Paris 06, Observatoire Océanologique, Sorbonne Universités

23 \*Corresponding author: tirichin@biologie.ens.fr

24

25

26 **Keywords**

27 Heterozygosity, Population genetics, Admixture, Phytoplankton, Diatoms, *Phaeodactylum*  
28 *tricornutum*

29

30 **Abstract**

31 Unlike terrestrial ecosystems where geographical isolation often leads to a restricted gene  
32 flow between species, genetic admixing in aquatic micro-eukaryotes is likely to be frequent.  
33 Diatoms inhabit marine ecosystems since the Mesozoic period and presently constitute one  
34 of the major primary producers in the world's ocean. They are a highly diversified group of  
35 eukaryotic phytoplankton with estimates of up to 200,000 species. Since decades,  
36 *Phaeodactylum tricornutum* is used as a model diatom species to characterize the functional  
37 pathways, physiology and evolution of diatoms in general. In the current study, using whole  
38 genome sequencing of ten *P. tricornutum* strains, sampled at broad geospatial and temporal  
39 scales, we show a continuous dispersal and genetic admixing between geographically isolated  
40 strains. We also describe a very high level of heterozygosity and propose it to be a  
41 consequence of frequent ancestral admixture. Our finding that *P. tricornutum* sequences are  
42 plausibly detectable at low but broadly distributed levels in the world's ocean further suggests  
43 that high admixing between geographically isolated strains may create a significant  
44 bottleneck, thus influencing their global abundance and distribution in nature. Finally, in an  
45 attempt to understand the functional implications of genetic diversity between different *P.*  
46 *tricornutum* ecotypes, we show the effects of domestication in inducing changes in the  
47 selection pressure on many genes and metabolic pathways. We propose these findings to  
48 have significant implications for understanding the genetic structure of diatom populations in  
49 nature and provide a framework to assess the genomic underpinnings of their ecological  
50 success.

51

52

## 53 **Introduction**

54 Diatoms are unicellular predominantly diploid and obligate photosynthetic eukaryotes. They  
55 belong to a large group of heterokonts, constituents of the chromalveolate [or SAR  
56 (Stramenopila, Alveolate, Rhizaria)] group, which are believed to have evolved from serial  
57 endosymbiosis involving green and red algal symbionts (Bowler et al. 2008; Moustafa et al.  
58 2009; Dorrell et al. 2017). Diatoms were first discovered by Ehrenberg in the 19th century in  
59 dust samples collected by Charles Darwin in the Azores. According to the earliest fossil  
60 records, they are believed to be in existence since at least 190 million years (Armbrust 2009)  
61 and their closest sister group are the Bolidomonads.

62 Diatoms are a highly diversified group of eukaryotic phytoplankton (Armbrust 2009), and exist  
63 in a wide range of shapes and sizes (Tirichine et al. 2017). Multiple ecological factors, including  
64 geographical isolation and competitive displacement, are proposed to account for the current  
65 global diversity of diatoms (Rabosky and Sorhannus 2009). These studies have further  
66 improved our understanding of the abundance and mosaic distribution of diatom species in  
67 the world's ocean, supporting the idea of their continuous and unrestricted dispersal (Finlay  
68 2002; Cermeno and Falkowski 2009), and suggesting that geographical isolation may not have  
69 a significant impact on gene-flow. However, our understanding of the mechanisms and  
70 evolutionary forces that stabilized/regulated this continuous mixing within a resident  
71 population, generating genetic and phenotypic diversity, is limited.

72 A sexual stage is considered obligatory in most diatom species (Chepurnov et al. 2004).  
73 However, they predominantly reproduce asexually and only a few species (Davidovich and  
74 Bates 1998; Chepurnov et al. 2002; Mouget et al. 2009; Davidovich et al. 2012; Godhe et al.  
75 2014) have actually been observed as having a sexual stage in their life cycle. *Phaeodactylum*  
76 *tricornutum* is a non-abundant coastal diatom species found under highly unstable  
77 environments like estuaries, rock-pools, etc. and has never been reported to undergo sexual  
78 reproduction. However, factors like small cell size, discontinuous sexual phases in diatoms,

79 and the observation that their sexual reproduction is sensitive to many nonspecific abiotic  
80 components (Mouget et al. 2009; Godhe et al. 2014), limit our ability to constrain the sexual  
81 cycle of these organisms. Despite its low abundance in the open ocean (Malviya et al. 2016),  
82 *P. tricornutum* is extensively used as a model diatom to characterize their metabolism (Bowler  
83 et al. 2008; Allen et al. 2011; Huysman et al. 2013; Morrissey et al. 2015; Tanaka et al. 2015;  
84 Fortunato et al. 2016), and to understand their evolution (Bowler et al. 2008). *P. tricornutum*  
85 is among the few diatom species with a whole genome sequence available to the community  
86 (Tirichine et al. 2017), and the only diatom for which state-of-the-art functional and molecular  
87 tools have been developed over the past few decades (Falciatore et al. 1999; Siaux et al. 2007;  
88 De Riso et al. 2009; Maheswari et al. 2009; Huysman et al. 2010; Maheswari et al. 2010;  
89 Veluchamy et al. 2013; Kaur and Spillane 2015; Veluchamy et al. 2015; Diner et al. 2016;  
90 Nymark et al. 2016; Rastogi et al. 2016). These resources have advanced *P. tricornutum* as a  
91 model diatom species and provided a firm platform for future genome-wide structural and  
92 functional studies.

93 Since the discovery of *P. tricornutum* by Bohlin in 1897 and the characterization of different  
94 morphologies or morphotypes, denoted fusiform, triradiate, oval, round and cruciform , 10  
95 strains from 9 different geographic locations (sea shores, estuaries, rock pools, tidal creeks,  
96 etc.) around the world, from sub-polar to tropical latitudes, have been isolated [well described  
97 in (De Martino 2007)]. These ecotypes have been collected within the time frame of  
98 approximately one century, from 1908 (Plymouth strain, Pt2/3) to 2000 (Daylan strain, Pt10)  
99 (De Martino 2007). All the strains have been maintained either axenically or with native  
100 bacterial populations in different stock centers and have been cryopreserved after isolation.  
101 Previous studies have reported distinct functional behaviors of different ecotypes as adaptive  
102 responses to various environmental cues (Stanley 2007; Bailleul et al. 2010; Abida et al. 2015;  
103 Taddei et al. 2016) but very little is known about their genetic diversity. Based on sequence  
104 similarity of the ITS2 region within the 28S rDNA repeat sequence, the ecotypes can be divided

105 into four genotypes (Genotype A: Pt1, Pt2, Pt3 and Pt9; Genotype B: Pt4; Genotype C: Pt5 and  
106 Pt10; Genotype D: Pt6, Pt7 and Pt8), with genotypes B and C being the most distant (De  
107 Martino 2007). These genotype clusters neither appear to correlate with their geographic  
108 sampling locations, nor with morphotype characteristics, or with the sampling year (Fig S1).  
109 This indicates low genetic distance between ecotypes that are geographically isolated, which  
110 is maintained across a long time scale and that trait diversity observed within *P. tricornutum*  
111 populations is largely independent of genotype.

112 The accumulated effect of diverse evolutionary and ecological forces such as recombination,  
113 mutation, selection, drift and admixture has been found to dictate the structure and diversity  
114 of genomes in a wide range of species (Liti et al. 2009; Cao et al. 2011; Flowers et al. 2015).  
115 Such studies within diatoms are rare and estimates of genetic diversity within diatom  
116 populations are mostly inferred using microsatellite-based genotyping approaches  
117 (Harnstrom et al. 2011; Whittaker and Ryneerson 2017). Although these techniques have  
118 revealed a wealth of information about diatom evolution, dispersal and reproductive  
119 physiology, additional insights can likely be obtained using state-of-the-art whole genome  
120 comparative analysis techniques. Deciphering the standing genomic variation of *P.*  
121 *tricornutum* across different ecotype populations is an important first step to assess the role  
122 of various evolutionary forces in regulating the adaptive capacities of diatoms in general  
123 (e.g.(Matuszewski et al. 2015)).

124 In order to understand the underlying genomic diversity within different ecotypes of *P.*  
125 *tricornutum* and to establish the functional implications of such diversity, we performed deep  
126 whole genome sequencing of the 10 most studied ecotypes. Using reference-based  
127 population genomics approaches, we present a genome-wide diversity map and the  
128 population genetics structure of geographically isolated ecotypes, revealing the impact of  
129 continuous admixing on the evolution of diatom populations. Further, while deciphering  
130 multiple haplotypes at the whole genome level using compensatory base changes (CBC)

131 analysis we show that these haplotypes are not reproductively isolated. Like in any model  
132 organism, this work further provides the community with whole genome sequences of the ten  
133 most studied ecotypes, which will be a valuable genetic resource for functional studies of  
134 ecotype-specific ecological traits in the future.

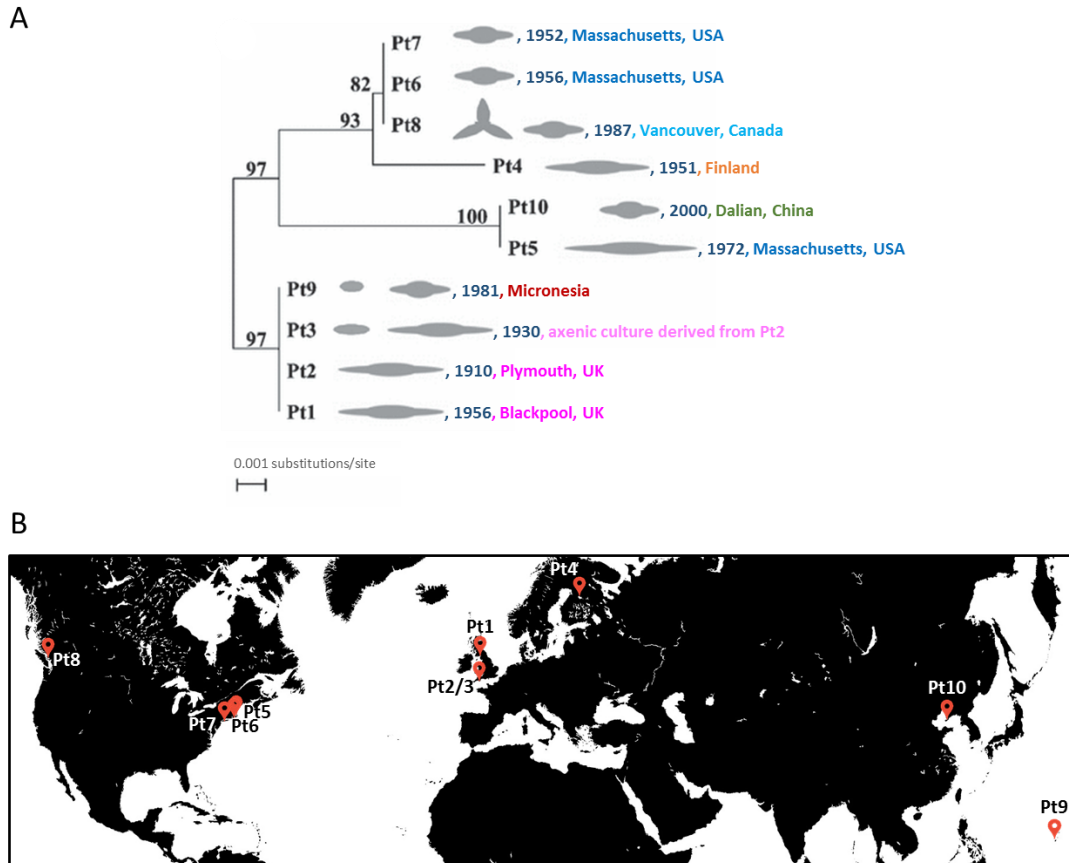

135

136 **Figure S1. Origins of *P. tricornutum* ecotypes used in this study.** (A) ITS2 tree derived from  
137 Martino et al. 2007 showing the dominant morphology, geographic location and year of  
138 sampling. (B) Ecotype map represents geographical sampling locations of all the *P. tricornutum*  
139 ecotypes used in the study.

140

## 141 Results

142

### 143 Heterozygous alleles account for most of the genetic diversity within *P. tricornutum* 144 ecotypes

145

146

147 We sequenced the genomes of 10 isolates of *P. tricornutum* and performed a reference-based

148 assembly using the genome sequence of the reference strain Pt1 8.6 (Bowler et al. 2008).

149 Across all ecotypes, the alignment depth ranged from 26X to 162X covering 92% to 98% of the  
150 genome (Table 1). The percentage of sequence reads mapped on the reference genome  
151 ranged between ~65% to ~80% (Table 1), which is independent of the size of the sequence  
152 library, as the latter does not correlate with genome coverage (Table 1). Because genome  
153 coverage is high, a portion of unmapped reads is likely a consequence of the incomplete  
154 reference assembly, which contains several gaps (Bowler et al. 2008). Also, many regions on  
155 the reference genome that are observed as being unmapped by reads from individual  
156 ecotypes are annotated as being rich in transposable elements (TEs) (Fig S2). Moreover, across  
157 all the ecotypes, the repeated proportion of unmapped reads varies between ~38% (Pt1) to  
158 75% (Pt4), with >90% similarity. Further, using a normalized measure of read depth (see  
159 Materials and Methods), we found that 259 and 590 genes, representing ~2% and ~5% of the  
160 total gene content, have been lost or exhibit copy number variation (CNV), respectively, across  
161 the 10 ecotypes with respect to the reference Pt1 8.6 (Fig 1A, Fig S3A) (File S1). Further, 21  
162 randomly chosen loci were validated by PCR for their loss from certain ecotypes compared to  
163 the reference strain Pt1 8.6 (Fig S4).

164 Approximately 70% of the genes that were either lost within ecotypes or present in many  
165 copies are shared among multiple ecotypes (Fig 1A). In addition, we discovered 207  
166 transposable elements (TEs) (~6% of the total annotated TEs) (File S2) to exhibit CNV across  
167 one or more ecotypes (Fig S3B). More precisely, 80% of all TEs showing CNVs are shared  
168 among two or more ecotypes, with Pt10 possessing the maximum number of ecotype-specific  
169 TEs exhibiting CNV (Fig S3B). Not surprisingly, across all the ecotypes, class I-type TEs, which  
170 undergo transposition via a copy-and-paste mechanism, show more variation in the estimated  
171 number of copies than class II-type TEs, which are transposed by a cut-and-paste mechanism  
172 (Fig S3C, S3D). Therefore, in light of the highly repetitive nature of unmapped reads and large  
173 structural variations within each ecotype genome, a major proportion of reads that remain  
174 unmapped are likely indicative of gene duplication events, transpositions and/or

175 translocations within individual ecotype genomes compared to the reference genome. This  
176 can be further explained with our observations from the Pt10 ecotype, whose WGS reads  
177 were only able to map ~92% of the reference genome (Table 1). As expected, large structural  
178 variations like CNV and gene loss analysis revealed the maximum number of genes being lost  
179 and maximum number of specific genes showing high copy numbers in Pt10 compared to the  
180 other ecotype genomes (Fig 1A).

181 Overall, each ecotype can be characterized by specific genetic features (~0.3% to ~28%  
182 ecotype-specific CNVs, Fig1A), possibly linked to the explicit functional behavior of some  
183 ecotypes in response to various environmental cues, as reported previously (Stanley 2007;  
184 Bailleul et al. 2010; Abida et al. 2015). Biological processes can only be traced, on average, for  
185 40% of the genes exhibiting ecotype-specific CNVs. Among all the enriched biological  
186 processes (chi-square test,  $P < 0.01$ ) that are associated to genes exhibiting ecotype-specific  
187 CNVs (File S3), a gene associated to nitrate assimilation (Phatr3\_EG02286) is observed to have  
188 higher copy number in Pt4. Nitrate assimilation was shown to be regulated extensively under  
189 low light or dark conditions to overcome nitrate limitation of growth in *Thalassiosira*  
190 *weissflogii* (Clark et al. 2002).

191

192 Next, we discovered 462,514 (depth  $\geq 4x$ ) single nucleotide variants (SNVs), including ~25%  
193 singleton sites, 573 insertions (of length 1 bp to 312 bp) and 1,801 deletions (of length 1 bp  
194 to 400 bp) (Fig 1B). Interestingly, we found that most of the SNVs are heterozygous (Fig 1B)  
195 and shared between different ecotypes (Fig 1C). The proportion of heterozygous alleles across  
196 all the ecotypes varies between ~45% (in Pt5 and Pt10) to ~98% (in Pt1, Pt2 and Pt3). Thus,  
197 homozygous SNVs are observed much less frequently (on average once every 8,314 bp) within  
198 ecotypes having high levels of heterozygosity ( $>90\%$ ; Pt1, Pt2, Pt3, Pt9) and more frequently  
199 (on average 1 out of 319 bp) in ecotypes where heterozygosity was comparatively low ( $<65\%$ ;  
200 Pt4, Pt5, Pt6, Pt7, Pt8, Pt10). Similarly, most INDELS (insertions and deletions) are also shared



201 between different ecotypes, except for Pt4, which possesses the highest proportion of specific  
202 INDELS (~75%) and SNVs (~35%) (Fig 1C). With an average transition to transversion ratio of  
203 ~1.6, the spectrum of SNVs across all the ecotypes reveals a higher rate of transitions over  
204 transversions. In total, compared to the reference allele, six possible types of single nucleotide  
205 changes could be distinguished, among which, G:C -> A:T and A:T -> G:C, accounted for more  
206 than ~60% of the observed mutations (Fig 1D). Interestingly, this observation is consistent  
207 across all the ecotypes, regardless of their striking difference in levels of heterozygosity. This  
208 might be mediated by DNA methylation, which is known to cause a high rate of C to T  
209 transitions.

210

| Library Name | Origin               | Year of Isolation | Mapped Read-Pairs | % Mapped Read-Pairs | Alignment Depth (X) | Genome Coverage (%) |
|--------------|----------------------|-------------------|-------------------|---------------------|---------------------|---------------------|
| Pt1          | Blackpool, UK        | 1956              | 3,642,044         | 79.41               | 26.5                | 98.0                |
| Pt2          | Plymouth, UK         | Prior to 1910     | 6,016,241         | 78.23               | 43.8                | 98.0                |
| Pt3          | Plymouth, UK         | 1930s             | 6,373,591         | 65.62               | 46.4                | 98.3                |
| Pt4          | Finland              | 1951              | 15,583,665        | 67.31               | 113.5               | 94.0                |
| Pt5          | West Dennis, MA, USA | 1972              | 5,346,009         | 75.50               | 38.9                | 93.2                |
| Pt6          | MA, USA              | 1956              | 3,922,830         | 64.50               | 28.5                | 94.1                |
| Pt7          | Long Island, NY, USA | 1952              | 4,937,516         | 67.30               | 35.9                | 94.9                |
| Pt8          | Vancouver, Canada    | 1987              | 22,235,170        | 78.36               | 162.1               | 94.4                |
| Pt9          | Guam, Micronesia     | 1981              | 7,551,099         | 74.68               | 55.2                | 97.5                |
| Pt10         | Dalian, China        | 2000              | 5,436,057         | 72.59               | 39.6                | 92.1                |

211

212 **Table 1. Reference-assisted mapping statistics.** The table summarizes the origin and year of  
213 sampling of each isolate of *P. tricornutum* along with the number of total reads mapped on the  
214 reference. Average depth (X=average number of reads aligned on each base covered across the  
215 entire genome) was estimated using the number of mapped read pairs and the horizontal  
216 coverage (aka. coverage breadth) across the whole genome.  
217

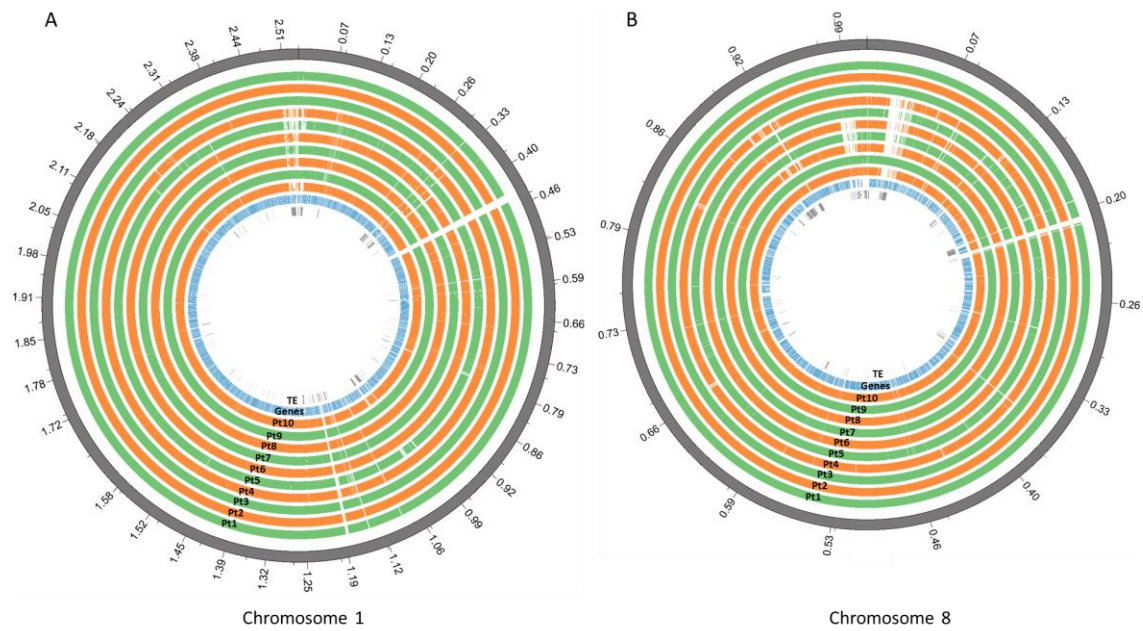

218

219 **Figure S2. Reference genome coverage.** CIRCOS plot showing genomic coverage of  
 220 chromosomes 1 and 8 by sequence alignment of reads corresponding to individual ecotypes.  
 221 The outermost circles represent chromosome 1 (A) and chromosome 8 (B) histograms. The two  
 222 innermost circles represent the genomic regions annotated as genes and transposable elements  
 223 (TEs), respectively, in the reference genome.  
 224

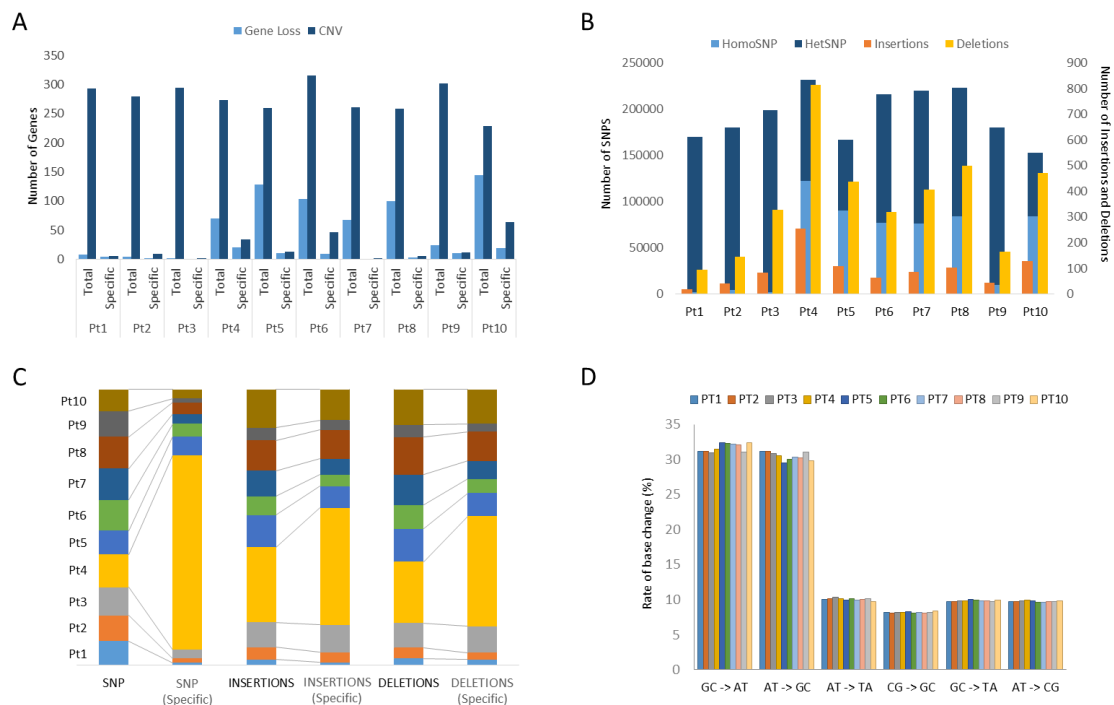

225

226 **Figure 1. Ecotype genome diversity.** (A) The bar plots represent the total and specific numbers of genes,  
 227 denoted on Y-axis, that exhibit a loss or multiple copies (CNV) within one or more  
 228 ecotypes. (B) The bar plot represents total number of discovered SNPs, with the proportion of  
 229 heterozygous SNPs (dark blue) and homozygous SNPs (light blue), INSERTIONS (orange)

230 and DELETIONS (yellow) in each ecotype compared to the reference genome. (C) The stack  
 231 bar plot represents the proportion of total vs specific polymorphic variant sites, including SNPs,  
 232 insertions and deletions (from left to right, respectively) across all the ecotypes. (D) The bar  
 233 plot represents the mutational spectrum of all the SNPs discovered across the ecotypes. Y-axis  
 234 denotes the total percentage of individual mutations observed as denoted on X-axis. Colors  
 235 used in the figure are chosen randomly and have no biological significance.  
 236  
 237

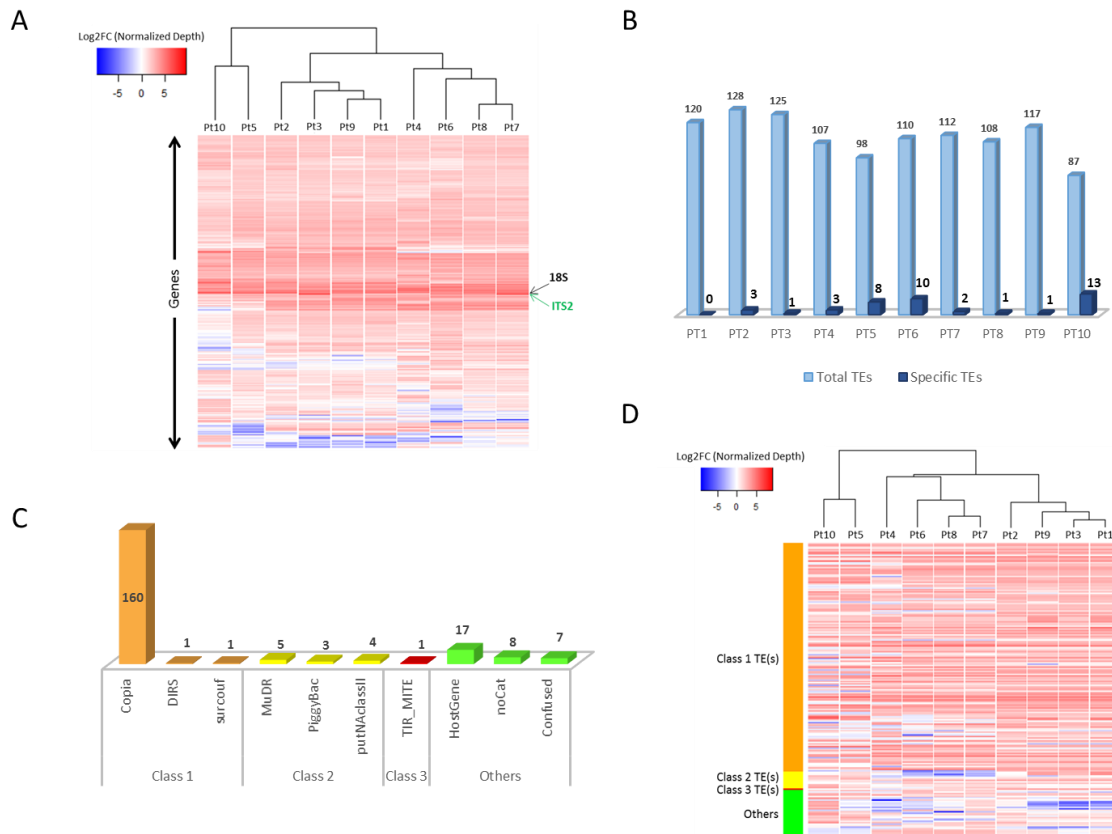

238

239 **Figure S3. Large structural variations within ecotypes.** (A) The heat-map displays the fold-  
 240 change (FC) of read depth between each reference gene and median of read depth of all the  
 241 reference genes, within each ecotype. Using Z-score as a measure of normalized read depth,  
 242 log2 fold change (FC) is calculated as a ratio of Z-score per gene to the average normalized  
 243 read depth of all the genes per ecotype. Low to high log2FC is represented by a blue to red  
 244 color gradient in the heat-map. From all the ecotypes only those genes are plotted where log2FC  
 245 is more than 2 in at least one of the ecotypes and are considered to exhibit copy number  
 246 variation (CNV). (B) The bar plots represent the number of total- and ecotype-specific  
 247 transposable elements (TEs) exhibiting CNV across one or more ecotypes. (C) The bar plot  
 248 represents the absolute numbers of different types of TEs, grouped as Class 1, 2, 3 and others,  
 249 exhibiting CNV. (D) With similar principle aesthetics as Figure S3A, the heat-map shows the  
 250 patterns of log2FC only across all the ecotypes of those TEs exhibiting CNV in at least one of  
 251 the ten ecotypes studied.  
 252  
 253

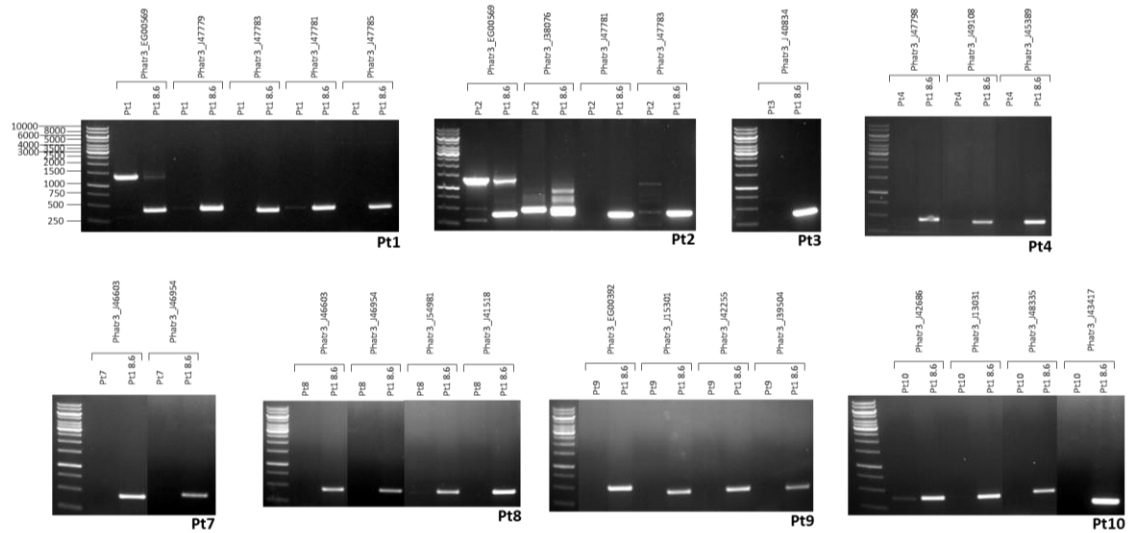

254

255 **Figure S4. Gene loss validation.** PCR validation of 21 candidate genes (denoted by their  
256 Phatr3 gene assignment codes) found to be absent in different ecotypes compared to the  
257 reference strain Pt1 8.6. The list of primers used in the experiment is provided in Table S1.

258

259

## 260 Genetic diversity between the ecotypes reveals the presence of four haplogroups

261

262 With an exception of Pt4, where we found the maximum number of variant alleles to be  
263 ecotype specific, most of the variant alleles within other ecotypes were shared between at  
264 least two ecotypes, indicating close genetic relatedness (File S3). In order to cluster the  
265 ecotypes based on their genetic distance we therefore estimated the Fixation Index ( $F_{ST}$ ) as a  
266 measure of genetic differentiation among all possible pairs of ecotypes, which ranges  
267 between 0.03 and 0.5 and suggests four haplogroups (Fig. 2A). These haplogroups are in broad  
268 agreement with 18S gene diversity and previous reports of ecotype diversity based on internal  
269 transcribed spacer 2 (ITS2) sequences (De Martino 2007) (Fig S5A and S5B), and were thus  
270 denoted haplogroup A (Pt1, Pt2, Pt3 and Pt9), haplogroup B (Pt4), haplogroup C (Pt5 and  
271 Pt10), and haplogroup D (Pt6, Pt7 and Pt8) (Fig 2A). Furthermore, the clustering of ecotypes  
272 within each haplogroup was consistent at the whole genome scale, as inferred by a  
273 phylogenetic tree generated using maximum likelihood algorithm based on all (Fig. 2B) and

274 only homozygous polymorphic sites (SNVs and INDELS) (Fig. 2B and S5C, respectively), across  
275 all the ecotypes.

276 Geographic isolation often leads to the delineation of isolated populations into different  
277 species that can be distinguished based on their ribosomal DNA sequences (Chu et al. 2013).

278 Inspection of the 18S and ITS2 rDNA gene sequences across different haplogroups indicated  
279 the presence of multiple variations, including both heterozygous and homozygous variant

280 alleles (Fig S5D and S5E). Because the ribosomal DNA region including 18S and ITS2 is highly  
281 repetitive, which is on average ~4 times more than non-ribosomal genes (Fig S2A), these

282 variations can be understood as intra-genomic variations within the genome. However,  
283 taxonomists and ecologists use differences within 18S gene sequences as a prominent

284 measure of species assignment and to estimate species delineation (Malviya et al. 2016). This  
285 latter practice has been shown to be very conservative as no differences in the 18S gene

286 between reproductively isolated species is expected in species with large effective population  
287 sizes (Piganeau et al. 2011). Alternatively, the possibility of sub-populations cannot be

288 ignored. Moreover, there are reports of cryptic speciation within planktonic foraminifers (de  
289 Vargas et al. 1999) and coccolithophores (Saez et al. 2003). Therefore, we first considered

290 examining the effect of subpopulations on the 18S gene heterozygosity within the ecotype  
291 cultures. We confirmed the expression of all the heterozygous alleles within the 18S rDNA

292 gene using whole genome and total-RNA sequencing of a monoclonal culture isolated from  
293 Pt8 population (constituent of haplogroup D), referred to as Pt8Tc (Fig S5D), indicating that

294 the cultures are single population.

295 To strengthen our understanding of the possibility of speciation, relating observed  
296 polymorphisms within 18S ribosomal marker gene to the presence of multiple species, we

297 analyzed the existence of compensatory base changes (CBCs) within secondary structures of  
298 the ITS2 gene between all the ecotypes. The presence of CBCs within ITS2 gene has been

299 recently shown to account for reproductive isolation in multiple plant species (Wolf et al.

300 2013) and between diatom species (Kaczmarek et al. 2014). By comparing the ITS2 secondary  
301 structure from all the ecotypes, we did not find any CBCs between any given pair of ecotypes  
302 (Fig S6). As a control, we compared the ITS2 secondary structure of all the *P. tricornutum*  
303 ecotypes with the ITS2 sequence of other diatom species (*Cyclotella meneghiniana*, *Pseudo-*  
304 *nitzschia delicatissima*, *Pseudo-nitzschia multiseriis*, *Fragilariopsis cylindrus*) that have  
305 significant degree of evolutionary divergence as depicted previously using multiple molecular  
306 marker genes (Medlin 2015; Tirichine et al. 2017), and found multiple CBCs in them (Fig S6).  
307 The results thus reject the hypothesis of haplogroups being different species and suggest  
308 theoretical sexual compatibility between different geographically isolated ecotypes.  
309

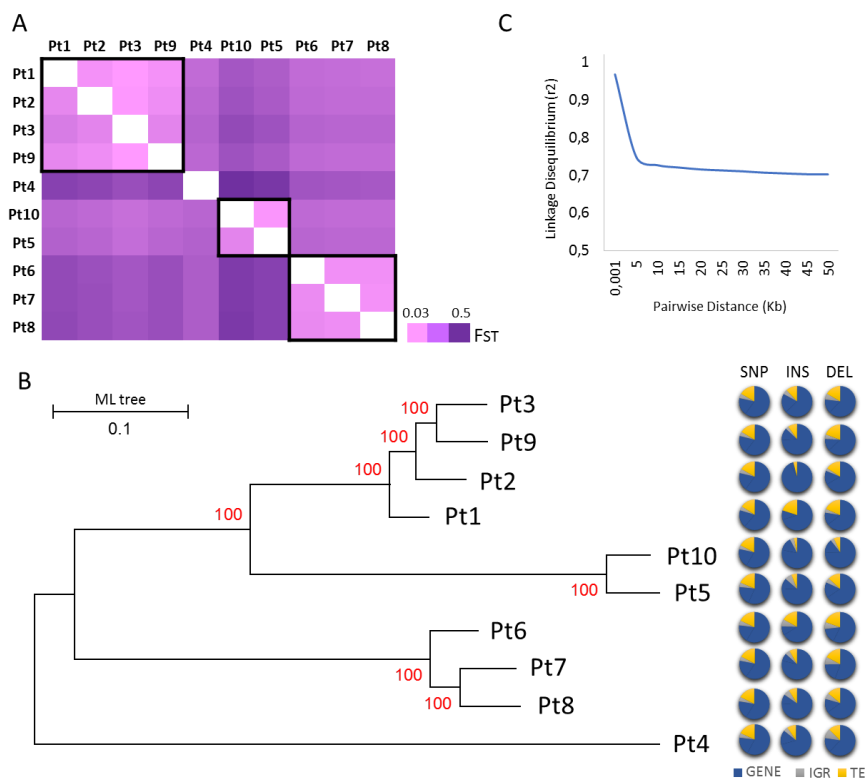

310

311 **Figure 2. Genetic diversity between the ecotypes.** (A) The heat-map measures the genetic  
312 differentiation or association between all possible pairs of ecotypes. The colors indicate  $F_{ST}$   
313 values, which range from 0.03 to 0.5, with a color gradient from pink to violet, respectively.  
314 Values closer to 0 signify high genetic exchange and 1 indicates no exchange between the  
315 populations. (B) Phylogenetic association of the ecotypes based on 468,188 genome-wide  
316 polymorphic sites (including SNP and INDELS) using a maximum likelihood approach. The  
317 numbers on the branches indicate the bootstrap values. Pie charts adjacent to each node of the  
318 whole genome tree corresponds to the proportion of SNPs and INDELS over all functional

319 features of the genome; GENES (blue), TEs (Transposable Elements, represented in yellow),  
 320 IGRs (Intergenic Regions, represented in grey). (C) The line plot represents the linkage  
 321 disequilibrium (LD) decay ( $r^2$ ) across all the haplogroups with pairwise distance between any  
 322 given pair of homozygous polymorphic alleles.  
 323  
 324

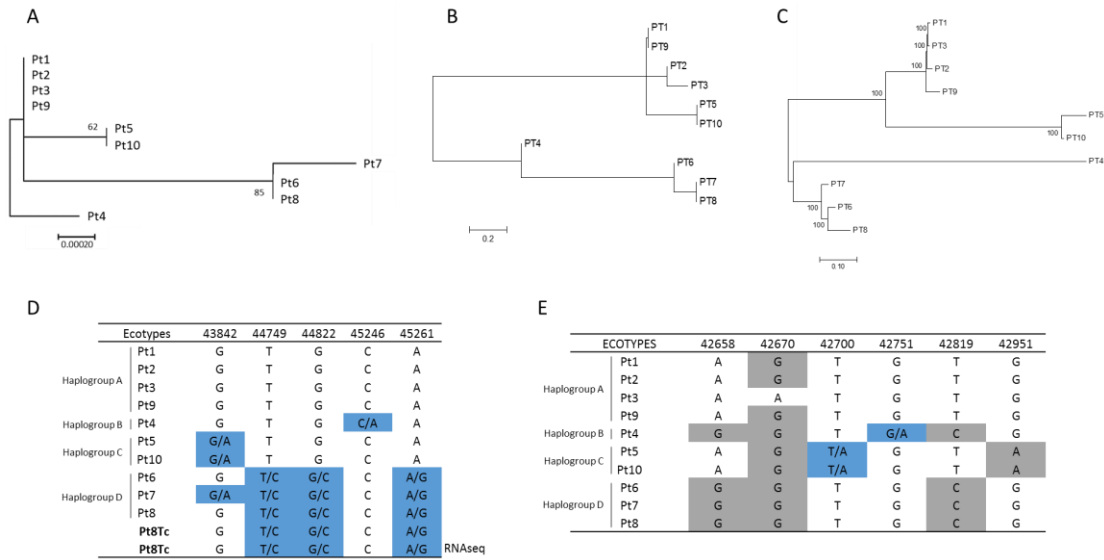

325  
 326

327 **Figure S5. Haplotype analysis.** Phylogenetic association of the ecotypes based on (A) 18S  
 328 and (B) ITS2 sequence alignment across 10 studied ecotypes, using maximum likelihood. (C)  
 329 Phylogenetic association of the ecotypes based on only homozygous genome-wide SNPs, using  
 330 maximum likelihood. Numbers on the branches of phylogenetic trees indicate bootstrap values.  
 331 Multiple sequence alignment of 18S and ITS2 sequences across the ten ecotypes revealed  
 332 multiple polymorphic positions as indicated in (D) and (E), respectively. Homozygous SNPs  
 333 are shown in grey, while heterozygous SNPs are shown in blue with all possible alleles.  
 334  
 335  
 336

337  
 338  
 339  
 340  
 341  
 342  
 343  
 344  
 345  
 346

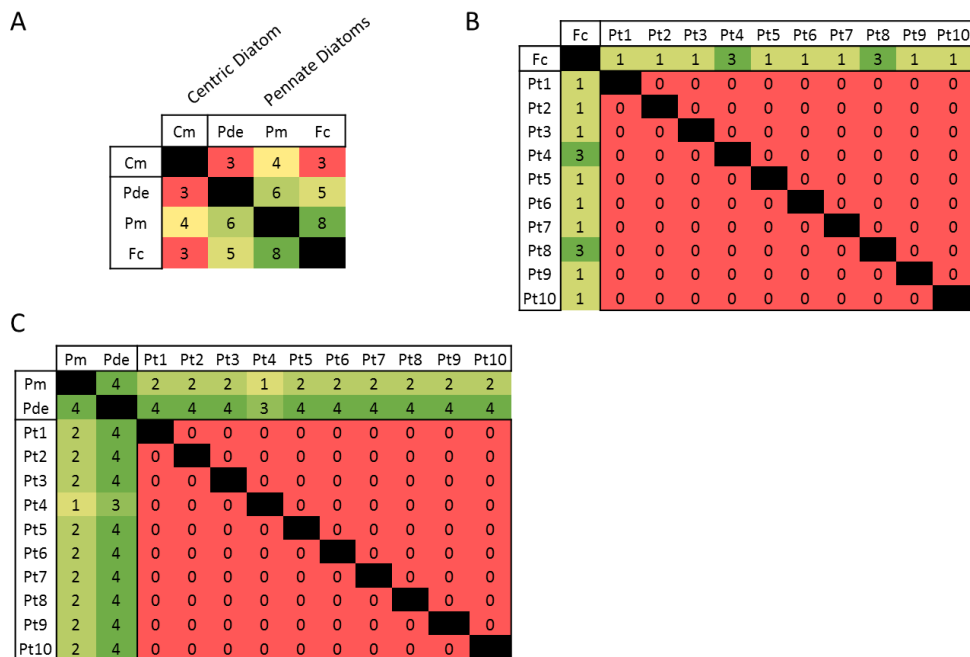

337



338

339 **Figure S6. CBC analysis.** Each matrix represents the number of compensatory base changes  
340 (CBC) found between any given pair of species upon comparing their ITS2 secondary  
341 structures. A color gradient from red to green indicates lowest to highest numbers of CBCs  
342 found between each pair. Cm denotes *Cyclotella meneghiniana*, Pde denotes *Pseudo-nitzschia*  
343 *delicatissima*, Pm denotes *Pseudo-nitzschia multiseriata*, Fc denotes *Fragilariopsis cylindrus*,  
344 and Pt denotes *Phaeodactylum tricoratum*. Cm is a centric diatom species, while Pde, Pm, Fc  
345 and Pt are pennate diatom species.

346

347

348

349 **Population genetics analysis reveals heterozygosity as a measure of continuous admixing**  
350 **and unstable genetic population**

351

352

353 We further wished to determine the genome wide nucleotide diversity across all the ecotypes.

354 With low genetic differentiation at the intra-haplogroup level compared to other haplogroups,

355 pairwise nucleotide diversity ( $\pi$ ) estimated in non-overlapping 1 kb windows across all the

356 ecotypes is  $0.002 \pm 0.001$  per site on average. This indicates that any two homologous

357 sequences taken at random across different populations will on average differ by  $\sim 0.2\%$ ,

358 which is remarkably low in comparison with polymorphism estimates in other unicellular

359 eukaryotes (Blanc-Mathieu et al. 2014; Flowers et al. 2015; Liti 2015). It is also slightly lower

360 than dimorphic fungi such as *Candida albicans* (Hirakawa et al. 2015). Linkage disequilibrium

361 (LD) analysis using only homozygous SNV sites revealed, on average, high linkage

362 disequilibrium ( $LD > 0.7$ ) over pairs of polymorphisms, as a consequence of the population

363 structure. Within 5 kb, LD declines with the increase in pairwise distance between sites (Fig

364 2C).

365 Considering high heterozygosity in the dataset, we investigated whether we could find

366 evidence of admixing between ecotypes. Therefore, we used ADMIXTURE (Alexander et al.

367 2009) to estimate the number of ancestral populations (K) of each ecotype. This allele-based,

368 unsupervised clustering algorithm uses a cross-validation error rate (CVE) (Alexander and

369 Lange 2011) to predict the most probable number of ancestral genomes that have influenced

370 the genetic makeup of present individuals or populations. The best-fit maximum likelihood



371 estimates of individual ancestry, quantified as  $K$ , is expected to exhibit a low cross-validation  
372 error compared to other values of  $K$ . Using the algorithm, we traced the influence of ten  
373 ancestral populations, as signified by lowest CV error value, on the genetic structure of the  
374 ecotypes (Fig S7). The cross-validation error deviation between  $K=6$  through  $K=10$  is relatively  
375 low indicating the insensitivity of cross-validation in population stratification when  $F_{ST}$   
376 between the studied populations are low (Fig 2A), as also reported previously (Alexander and  
377 Lange 2011). However, although individual haplogroups maintain similar ancestral admixtures  
378 across  $K = 6$  through  $K = 9$  (Fig S7), at  $K = 10$  the ancestry assignment differentiated the Pt4  
379 specific composition, consistent with the high proportion of non-shared regions in the Pt4  
380 genome (Fig 1A and Fig 1C). Further, the proportion of individual ancestral populations was  
381 found to be variable in each ecotype (Fig 3A), which could be a consequence of selection to  
382 local environments. The admixing does not correlate with the geographic distribution of most  
383 ecotypes (Fig 3A), suggesting non-restricted dispersal of *P. tricornutum* even though it is a  
384 coastal species. Furthermore, the admixtures are consistently maintained in ecotypes that  
385 were sampled in different years of the last century, indicating continuous genetic exchange  
386 between their ancestors (Fig 3B).

387 From the four distinguishable haplogroups, haplogroup A (Pt1, Pt2, Pt3 and Pt9) shows  
388 maximum admixture while haplogroup B (Pt4) has the least admixing with only two major  
389 ancestral admixtures (Fig 3A). Interestingly, this pattern of admixing is consistent with the high  
390 levels of heterozygosity within haplogroup A ecotypes (Pt1, Pt2, Pt3 and Pt9), where most of  
391 the alleles are also deviated from Hardy-Weinberg equilibrium (HWE) (Fig 3B). This suggests  
392 that the ecotypes are under isolate-breaking effect. Isolate breaking is a phenomenon where  
393 heterozygosity temporarily increases in the population when distinct  
394 populations/subpopulations interact and/or interbreed (Dorak 2014). Supporting the latter,  
395 most of the variant alleles in the Pt4 ecotype, which displays the lowest admixing, are

396 homozygous with relatively low proportions of heterozygous alleles deviating from HWE (Fig  
397 3B). This suggests that most of the heterozygosity is due to frequent mixing of the  
398 geographically isolated strains and that not all of the heterozygous alleles can be explained as  
399 being selected under balancing selection.

400 Genetic admixing between distant populations can lead to their extinction (Wecek et al.  
401 2016). This can account for the low abundance of *P. tricornutum* in nature, as genetic admixing  
402 between the strains is continuous. Therefore, taking advantage of *Tara* Oceans (Karsenti et al.  
403 2011) meta-genomics (MetaG) and meta-transcriptomics (MetaT) data that resulted from a  
404 broad geospatial sampling of microeukaryotes (Carradec et al. Under revision), we attempted  
405 to re-evaluate the abundance of *P. tricornutum* in nature, even though it has not been found  
406 in 18S-based metabarcoding data from this project (Malviya et al. 2016). By following the  
407 lowest common ancestor algorithm (LCA) and using PhyloDB (Dupont et al. 2015) as reference  
408 database, we were able to track a wide albeit very low abundant distribution of *P. tricornutum*  
409 (Fig 3C) in the world's ocean by taxonomically assigning *Tara* Oceans unigenes (Carradec et al.  
410 Under revision) to *P. tricornutum*. From the set of unigenes assigned as unclassified diatoms  
411 in the global ocean atlas of eukaryotic genes (Carradec et al. Under revision), we were able to  
412 assign 70 unclassified diatom unigenes to best represent *Phaeodactylum* species complex (File  
413 S5sheetA), with an average coverage of 80% - >95% and 60% - 80% DNA sequence level  
414 identity (Fig S9A) over 118 PhyloDB reference genes of *P. tricornutum*. Most of the 118  
415 reference genes, onto which the unigenes have the best hits, were specific to *P. tricornutum*  
416 (Rastogi et al. Submitted) with highest (on average >94%) unigene coverage over them (Fig  
417 S9B) (File S5sheetB). Since the percentage identity of the unigene sequences with *P.*  
418 *tricornutum* references are quite low, the assignation might be biased towards  
419 *Phaeodactylum* and the unigenes could be derived from unsequenced species, branching  
420 between *P. tricornutum* and the next closest sequenced species. However, compared to *P.*

421 *tricornutum* reference genes that are shared broadly among the diatom clade (diatom specific  
 422 genes), the unigene coverage over *P. tricornutum* specific genes is very high (Fig S9B) and  
 423 define these genes as potential references for further experimental assessment of *P.*  
 424 *tricornutum* distribution in the open ocean. We then determined the relative expression of *P.*  
 425 *tricornutum* assigned unigenes using meta-transcriptomics (MetaT) data, which further  
 426 correlated with the distribution of *P. tricornutum* depicted by MetaG (Fig. S8). However,  
 427 relative to *Skeletonema* and *Pseudo-nitzschia*, genera that can also reproduce asexually with  
 428 limited admixing preferences (Casteleyn et al. 2010; Harnstrom et al. 2011), the abundance  
 429 of *P. tricornutum* is very low and is much less widely distributed (Fig. 3D, 3E, and S8).

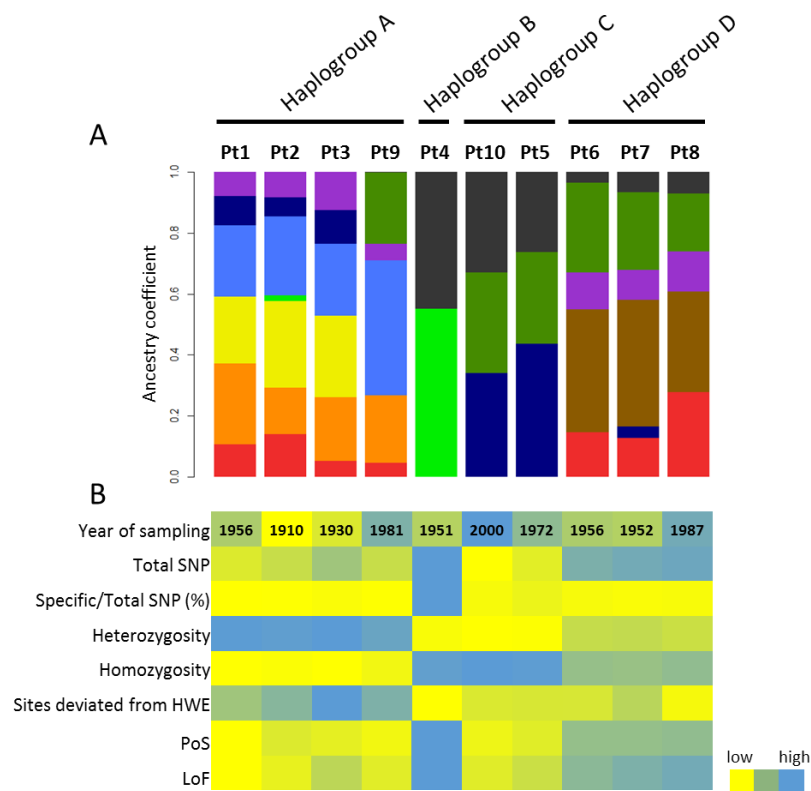

430

431 **Figure 3. Population structure of the ecotypes.** (A) Admixture analysis of the 10 studied *P.*  
 432 *tricornutum* ecotypes using ADMIXTURE. The bar plot represents individual ancestries within  
 433 each ecotype and estimated using an unsupervised clustering algorithm employed in  
 434 ADMIXTURE, which predicted 10 (K=10) ancestral populations, represented with 10 different  
 435 colors. Y-axis represents the proportion of individual ancestry within each ecotype (represented  
 436 on top X-axis). (B) The color gradient from yellow to blue indicates low to high numerical  
 437 values across each ecotype (indicated on top X-axis of panel A) within different functional  
 438 categories indicated on Y-axis. These include (from top to bottom), Year of sampling = Year  
 439 in which the respective ecotype was sampled, Total SNP = Absolute number of SNPs found in

440 each ecotype, Specific/Total SNP (%) = percentage of ecotype specific SNPs, Heterozygosity  
 441 = Number of heterozygous SNPs from a set of total SNPs within each ecotype, Homozygosity  
 442 = Number of homozygous SNPs from a set of total SNPs within respective ecotype, Sites  
 443 deviated from HWE = Number of SNP sites been predicted to be deviated from Hardy-  
 444 Weinberg equilibrium (HWE), PoS = Number of genes under Positive Selection (PoS), LoF =  
 445 Number of genes localizing Loss of Function variant sites.  
 446  
 447  
 448

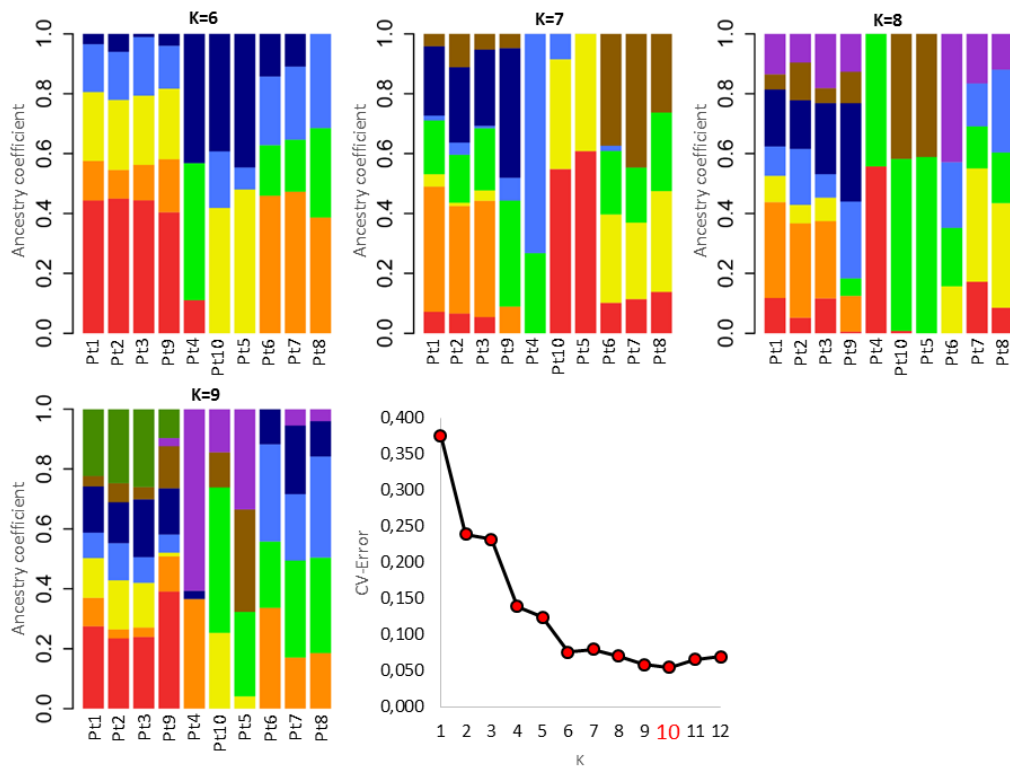

449

450 **Figure S7.** Allele-based estimates of ancestry in ten ecotypes of *P. tricornutum* as inferred by  
 451 ADMIXTURE. Unsupervised results for K = 6-9 are displayed with the distribution of cross-  
 452 validation error rate (represented on Y-axis of the line plot) across different values of K  
 453 (represented on X-axis of the line plot). 5-folds cross validation indicated K = 10 as the best fit  
 454 (represented in Fig. 3A) but given the limitation of ADMIXTURE in classifying populations  
 455 with low  $F_{st}$ , and a stable distribution of CV-Error values from K = 6 through K = 10 compared  
 456 to its distribution across K = 1:5, we therefore predictably focused on K = 6:10 ancestral  
 457 populations.  
 458  
 459

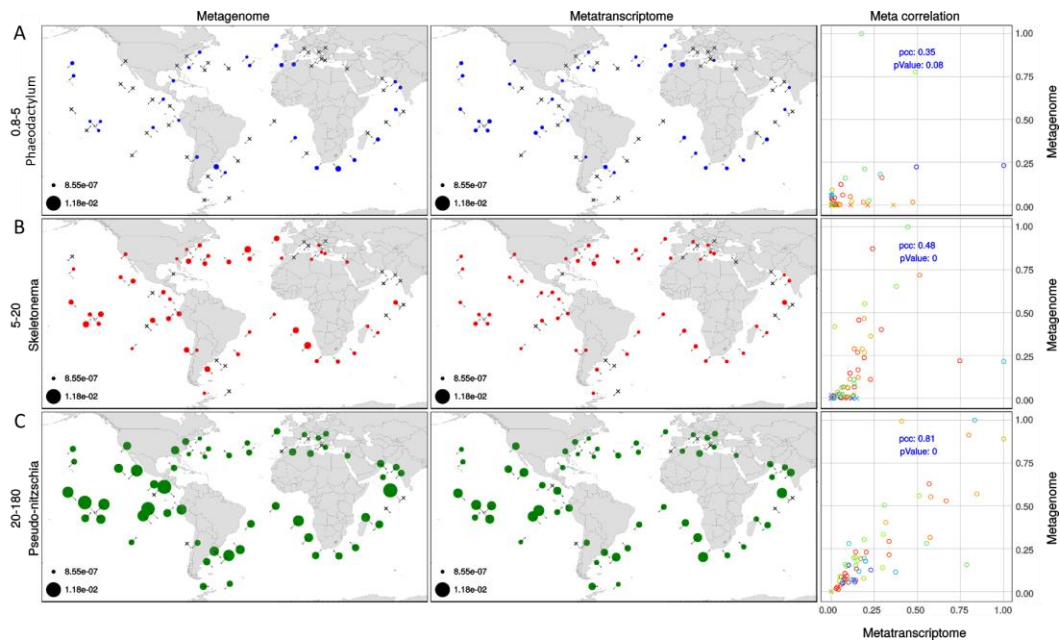

460  
461  
462  
463  
464  
465  
466  
467  
468  
469  
470  
471  
472  
473  
474  
475

**Figure S8. Global abundance and distribution of *Phaeodactylum*, *Skeletonema* and *Pseudo-nitzschia* genera based on *Tara* Oceans metagenomics and metatranscriptomics data.** Unigene relative abundance from *Phaeodactylum* (A), *Skeletonema* (B) and *Pseudo-nitzschia* (C) detected within *Tara* Oceans samples are represented. Based on the known morphologies of the species within each genus, we investigated the abundance and distribution of these three genera within size fraction 0.8-5, 5-20 and 20-180 micrometers, respectively (Y-axis). The levels of relative abundance (Metagenome, MetaG) and expression (Metatranscriptome, MetaT) of each clade are represented by the disk area. We highlighted by "X", the *Tara* Oceans stations where a clade was not detected. Meta correlations signify the relation between metagenome and metatranscriptome levels, expressed as a ratio of the total abundance and expression, respectively. Scatter plots indicate Pearson correlation coefficients (pcc) and p-values in blue.

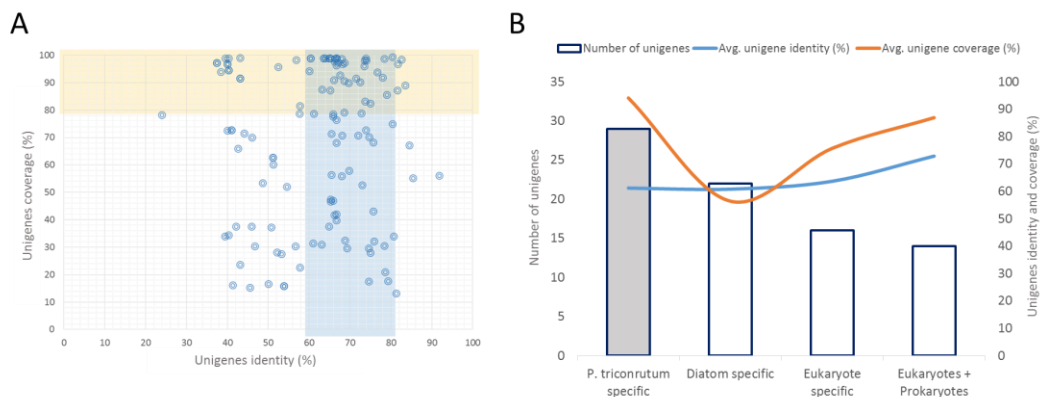

476

**Figure S9. Conservation assessment of *P. tricornutum* genes across various taxonomic groups in the tree of life depicts maximum coverage of unclassified diatom unigenes over *P. tricornutum* specific genes.** From our analysis of sequence divergence of *P. tricornutum* genes along the tree of life, we looked into the nature of *P. tricornutum* reference genes aligned to the *Tara* Oceans unigenes, which were taxonomically assigned as unclassified diatoms in previous study (Carradec et al. Under revision), with variable identity. (A) The scatter plot represents the percent coverage (Y-axis) and identity (X-axis) of all the unigenes mapped onto

484 the *P. tricornutum* reference genes. Most of the unigenes assigned as *Phaeodactylum* achieved  
485 60 to 80% of DNA sequence identity (highlighted with blue) and 80% to >95% of coverage  
486 (highlighted in dusty yellow). (B) The bar plot represents the total number of reference genes  
487 with different conservation patterns (Left Y-axis). The line in the plot indicates (right Y-axis)  
488 the average percent coverage (Orange) and sequence identity (Blue) of all the unigenes on the  
489 reference genes clustered based on their conservation patterns (X-axis).

490

491

492

### 493 **Functional characterization of polymorphisms suggests adaptation to laboratory conditions**

494

495

496 Species are under continuous pressure to adapt to a changing environment over time. We

497 therefore wanted to understand the functional consequences of the genetic diversity

498 between the ecotypes. Localization of the polymorphic sites over genomic features (genes,

499 transposable elements, and intergenic regions) revealed the highest number of variants over

500 genes (Fig 2B), specifically on exons, and was consistent across all the studied ecotype

501 populations. An average non-synonymous to synonymous variant ratio (N/S) was estimated

502 to be ~0.87, which is higher than in *Chlamydomonas reinhardtii*, N/S = 0.58 (Flowers et al.

503 2015). We further identified genes within different haplogroups experiencing strong selection

504 pressure based on their high Ka/Ks (dN/dS) ratios. Since decades, this ratio is widely adopted

505 as a measure of selective pressure in a wide range of species (Nielsen and Yang 1998; Yang et

506 al. 2000). Across all the ecotypes, 128 genes displaying positive selection (PoS) could be

507 detected, among which 47% are specific to one or more haplogroups (Fig 4A). Furthermore,

508 many genes (902) were found to have loss-of-function (LoF) variant alleles (Fig 4A), including

509 frame-shift mutations and mutations leading to theoretical start/stop codon loss or gain of

510 premature start/stop codons. Consistent with our observations of high admixing leading to

511 high heterozygosity in haplogroup A (Pt1, Pt2, Pt3 and Pt9) compared to other haplogroups

512 such as haplogroup B (Pt4), hence making selection of loci limiting, we observed very few loci

513 to be under natural selection (PoS) within haplogroup A ecotypes compared to haplogroup B

514 (Fig 3B).

515 Based on the presence of functional domains, all *P. tricornutum* annotated genes (Phatr3,  
516 [http://protists.ensembl.org/Phaeodactylum\\_tricornutum/Info/Index/](http://protists.ensembl.org/Phaeodactylum_tricornutum/Info/Index/)) were grouped into  
517 3,020 gene families. These families can be as large as the reverse transcriptase gene family,  
518 which is also highly abundant in marine plankton (Lescot et al. 2016), representing 149  
519 candidate genes having reverse transcriptase domains, or as small as families that constitute  
520 single gene candidates. Across all the ecotypes, we observed that the majority of genes  
521 experiencing LoF mutations belong to large gene families (Fig 4B). This is consistent with a  
522 previous observation of the existence of functional redundancy in gene families as a balancing  
523 mechanism for null mutations in yeast (Gu et al. 2003). Therefore, to estimate an unbiased  
524 effect of any evolutionary pressure (LoF allele or Positive selection mutations) on different  
525 gene families, we calculated a ratio, named the effect ratio (EfR, see Methods), which  
526 normalizes the fact that if any gene family has enough candidates to buffer the effect on some  
527 genes influencing evolutionary pressure, it will be considered as being less affected compared  
528 to those for which all or most of the constituents are under selection pressure. From this  
529 analysis, each haplogroup displayed a specific set of gene families to be under selection  
530 pressure (Fig S9). Significantly enriched biological processes (chi-squared test; P-value<0.05)  
531 associated to haplogroup A-specific gene families that are under selection included  
532 chlorophyll biosynthetic process, DNA intergration, fructose 6-phosphate metabolic process  
533 and pteridine-containing compound metabolic processes. Similarly, haplogroup B-specific  
534 gene families that are under strong adaptive selection exhibit significant enrichment of  
535 processes such as posttranslational protein targeting to membrane, translocation, RNA 3'end  
536 processing involving polyadenylation, and terpenoid biosynthetic process. Haplogroup C gene  
537 families that are under selection include the enrichment of processes like DNA-templated  
538 transcription, histone acetylation and vesicle-mediated transport. Likewise, haplogroup D-  
539 specific gene families that are under selection include biological processes such as arginyl-  
540 tRNA aminoacylation, intracellular signal transduction, lipid catabolic process and N-glycan



541 processing. Apart from the haplogroup specific families that are under selection pressure,  
542 across all the ecotypes a group of gene families associated to methionine biosynthesis (MetH,  
543 Phatr3\_J23399) was also observed as experiencing strong adaptive selection (Fig S9). All  
544 enriched biological processes associated to genes under positive selection in each haplogroup  
545 can be found in File S3.

546 In *P. tricornutum*, MetE (cobalamin-independent methionine synthase) and MetH (cobalamin-  
547 dependent methionine synthase) are known to catalyze homocysteine to methionine in the  
548 presence of symbiotic bacteria and vitamin B12 in the growth media, respectively. Previous  
549 reports have suggested that growing axenic cultures in conditions of high cobalamin  
550 availability results in repression, leading to the loss of MetE function and high expression of  
551 the MetH gene in *P. tricornutum* and *C. reinhardtii* (Helliwell et al. 2011; Bertrand et al. 2012;  
552 Helliwell et al. 2015). In accordance with these results, we observed a high expression of *MetH*  
553 in axenically grown laboratory cultures (Fig 4C) and thus a strong selection signal over the  
554 *MetH* gene. We speculate this to happen because of the high availability of cobalamin in the  
555 laboratory growth media used to maintain all the ecotype strains over the last decades, which  
556 might be due to evolution triggered by laboratory culture conditions. However, we were not  
557 able to trace any significant signature for the loss of *MetE* gene although its expression is  
558 significantly lower in axenic cobalamin containing cultures (Fig 4D), suggesting that its loss  
559 might require further generations, or that adaptation to new conditions requires the silencing  
560 of *MetE* without its complete loss which likely involves epigenetic mediated regulation. Similar  
561 observations were obtained for *CBA1* and *SHMT* genes in *P. tricornutum* and *T. pseudonana*  
562 (Bertrand et al. 2012), which under cobalamin scarcity enhance cobalamin acquisition and  
563 manage reduced methionine synthase activity, respectively (Fig 4E and 4F).

564 Considering all pairwise correlated gene families exhibiting similar selection signals (Positive  
565 selection (PoS) and Loss of function mutations (LoF)), measured using EfR, among the 10  
566 ecotypes, we used hierarchical clustering to examine the functional closeness of ecotype



567 populations with one another. Consistent with the population's genetic structure, ecotypes  
 568 within individual haplogroups were more closely related than the ecotypes belonging to other  
 569 haplogroups (Fig S10A and S10B), suggesting variation in functional relatedness between  
 570 different proposed haplogroups.  
 571

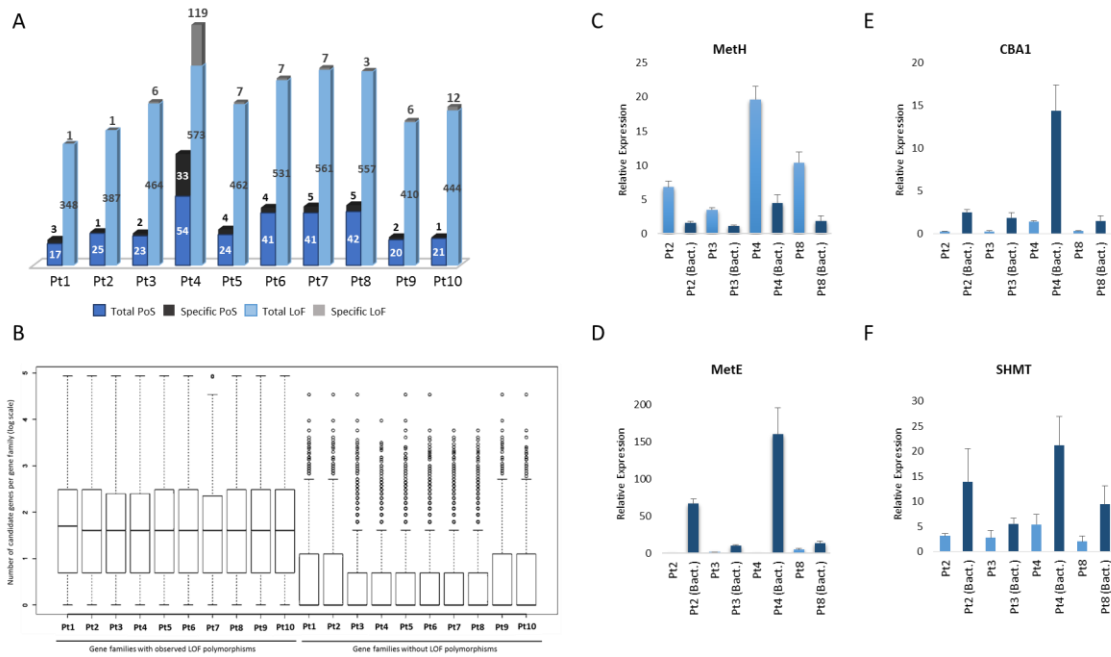

572

573 **Figure 4. Evolutionary and functional consequences of polymorphisms.** (A) The bar plot  
 574 represents total and specific number of genes that are subject to positive selection, or  
 575 experiencing loss-of-function (LoF) mutations. For each category, the ecotypes are plotted as  
 576 stack plot with total and specific numbers of genes. Numbers of each gene in each category is  
 577 indicated. (B) The box plot represents the number of gene families being affected by loss-of-  
 578 function (LOF) mutations and suggests a bias of such mutations on the genes belonging to large  
 579 gene families. Y-axis represents, as log scale, the number of genes in the gene families vs those  
 580 that are not affected by LOF mutations. (C, D, E and F) The bar plots represent relative  
 581 expression of *MetH*, *MetE*, *CBA1* and *SHMT* genes in four (Pt2, Pt3, Pt4 and Pt8) of the ten  
 582 ecotypes with the presence of vitamin B12 in axenic cultures (light blue bars) and bacteria with  
 583 no vitamin B12 in the growing media (dark blue bars).  
 584

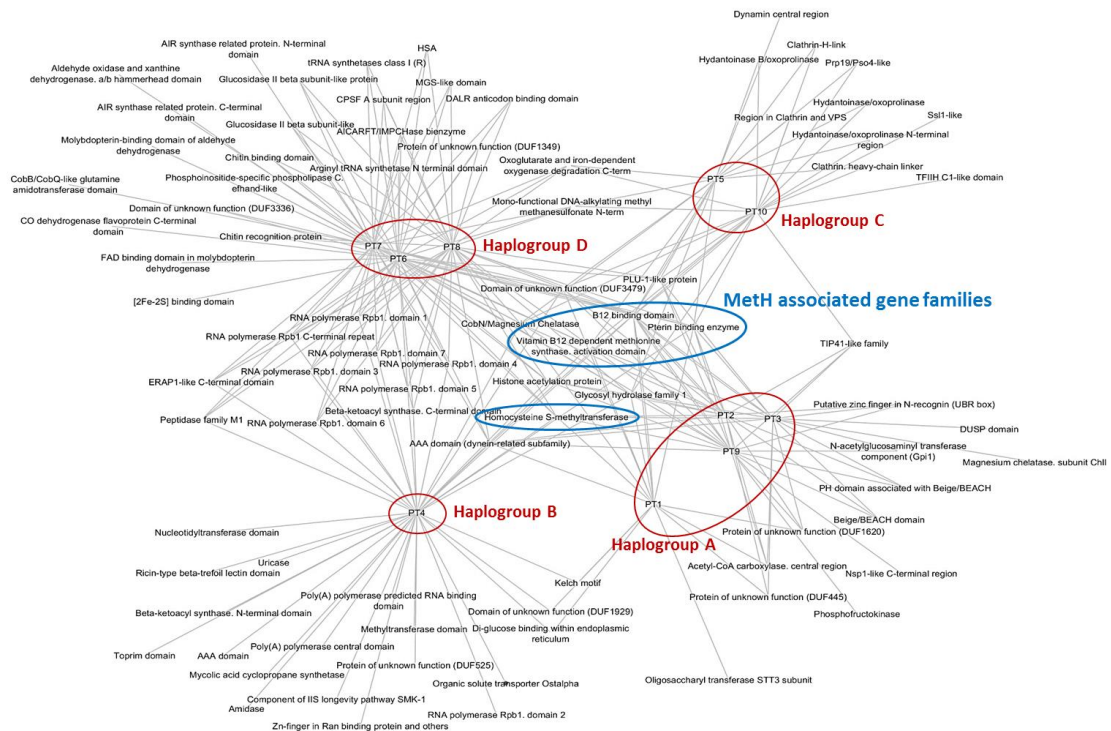

585

586 **Figure S10. Natural selection within Haplogroups.** Based on the EfR, the network displays  
 587 highly affected gene families experiencing positive selection. Gene families associated to Meth  
 588 genes under positive selection in all the ecotypes are indicated within blue circle.

589

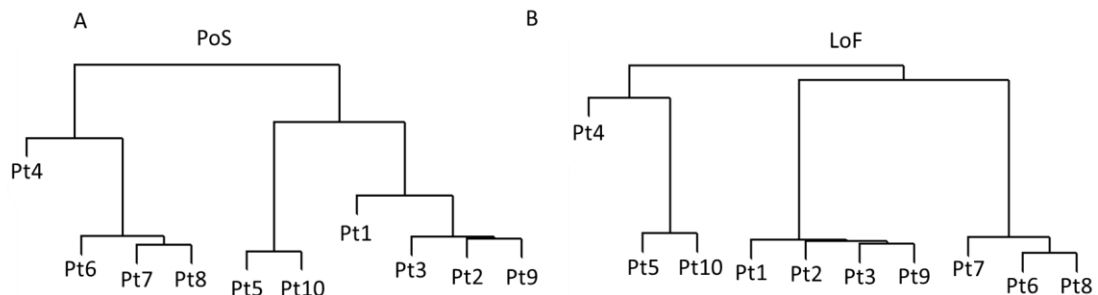

590

591 **Figure S11. Functional clustering of the ecotypes.** Hierarchical clustering using Pearson  
 592 pairwise correlation of effect ratio (EfR) measured for affected gene families within each  
 593 functional category [(A) Positive Selection (PoS); (B) Loss of Function (LoF)] to examine the  
 594 functional congruency between all the ecotypes.

595

596

## 597 Discussion

598 Using whole genome sequence analysis of *P. tricornutum* ecotypes sampled over a time span

599 of a century, this study reveals continuous gene flow between geographically isolated

600 populations, in line with previous observations indicating that dispersal is not limited within

601 diatoms (Finlay 2002; Cermeno and Falkowski 2009). It further sheds light on the subsequent  
602 effects of non-restricted dispersal and admixing of the genetic makeup of each ecotype,  
603 revealing heterozygosity as an indicator of unstable genetic structure of a diatom population.  
604 Furthermore, considering the low abundance of *P. tricornutum* in the ocean, we propose that  
605 dynamic environmental niche coupled with repeated gene flow between geographically  
606 isolated populations act as strong bottlenecks on species richness possibly through a gradual  
607 decrease in the effective population size coupled with Muller's ratchet (Crow 2005). Finally,  
608 the study points out the effect of domestication on restructuring of the functional pathways  
609 within diatoms, leading to the selection of a change in functional phenotype.

610 Following reference-based assembly, a high (>90%) coverage of the reference genome could  
611 be mapped by sequencing reads from individual ecotype WGS libraries. The unmapped  
612 reference genome, however, is a consequence of partial reference genome assembly,  
613 transpositions and copy number variations within individual ecotype genomes. From the  
614 study, we found heterozygous alleles to account for most of the genomic diversity between  
615 the ecotypes. Despite high variability in the levels of heterozygosity between different  
616 ecotypes, the mutational spectrum, compared to the reference and across all the ecotypes  
617 consisted of high G:C -> A:T and A:T -> G:C transitions. Deamination of cytosines dominantly  
618 dictates C to T transitions in both plants and animals (Becker et al. 2011; Rahbari et al. 2016),  
619 and CpG methylation potential of the genome is greatly influenced by heterozygous SNPs in  
620 the CpG dinucleotides (Shoemaker et al. 2010). Previous studies have demonstrated low DNA  
621 methylation in *P. tricornutum*, using Pt1 8.6, a monoclonal strain isolated from Pt1 single cell,  
622 as a reference. Because the Pt1 ecotype attains maximum levels of heterozygous variant  
623 alleles, testing for DNA methylation patterns across different ecotypes, maintaining variable  
624 levels of heterozygosity, may provide an opportunity to dissect cross-talk between loss of  
625 heterozygosity and DNA methylation in the selection of certain traits (Kanai et al. 2000).

626 Heterozygosity is higher in ecotypes sharing numerous ancestral admixtures (Pt1, Pt2, Pt3,  
627 Pt9, Pt6, Pt7 and Pt8) compared to the ecotypes with low admixtures (Pt4, Pt5 and Pt10)  
628 indicating a prominent role of continuous gene flow in retaining high heterozygosity.  
629 However, heterozygosity may also be maintained under balancing selection (Sellis et al. 2011;  
630 Sellis et al. 2016) where heterozygous loci are more advantageous than homozygous loci  
631 (Ferreira et al. 2011). This phenomenon has recently been studied in diatoms where  
632 maintenance of bi-allelic expression of numerous loci has been demonstrated in the cold-  
633 adapted diatom species *Fragilariopsis cylindrus* (Mock et al. 2017). Furthermore, continuous  
634 and non-restricted admixing between *P. tricornutum* populations can account for its low  
635 abundance in nature. As with fast reproducing rates and dynamic ecological niche in locations  
636 where population size is small, frequent admixing can result in selecting unfavorable alleles in  
637 the resident population, leading to extinction (Wecek et al. 2016). The phenomenon is more  
638 plausible relative to *Skeletonema marinoi* and *Pseudo-nitzschia pungens*, which are abundant  
639 diatom species (Kooistra et al. 2008) and yet, regardless of the frequent dispersal of  
640 geographically structured strains, they refrain from genetic admixing (Casteleyn et al. 2010;  
641 Harnstrom et al. 2011).

642 Further, based on low genetic diversity across all the ecotypes and the presence of multiple  
643 variant positions within the 18S and ITS2 reference sequences, we can cluster all ecotypes  
644 into four haplogroups, which is in consensus with previous studies (De Martino 2007). The  
645 topology of association between the haplogroups was further confirmed to exhibit coherency  
646 at the whole genome level. Hierarchical clustering based on the variation in the number of  
647 copies of different genes and TEs shared among ecotypes further confirms the associations of  
648 ecotypes at both inter and intra haplogroup level. Most of the shared genetic structure  
649 between the ecotypes is independent of their geographical distribution and their year of  
650 sampling, suggesting unceasing and non-restricted dispersal and genetic exchange between

651 different geographically isolated ecotypes, and only a limited impact of laboratory culturing  
652 on genome rearrangements.

653 The mechanisms and conditions that favor admixture are not clear because low  
654 recombination signatures were detected between the ecotypes, consistent with the observed  
655 high levels of LD between the alleles. However, various components (genes) of meiosis  
656 pathway are conserved in *P. tricornutum* as well as in other diatom species known to undergo  
657 sexual reproduction (Patil et al. 2015). These components include genes that have other  
658 known functions outside meiosis along with many genes whose functional role is limited to  
659 meiosis. This suggests the possibility of sexual reproduction within *P. tricornutum* and can  
660 explain the mechanism of genetic exchange between different ecotypes. Further, the absence  
661 of contemporary base changes (CBC) within ITS2 gene secondary structure between all the  
662 ecotypes, compared to the presence of many CBCs between *P. tricornutum* ecotypes and  
663 other diatom species, suggests that the ecotypes may be able to reproduce sexually. Our  
664 analysis reveals broad geo-spatial *P. tricornutum* distribution in the world's ocean suggesting  
665 that the dispersal of ecotypes to different localities is occurring and may be fostered by ocean  
666 currents (Whittaker and Rynearson 2017), human activities like rafting, ballasting (Thiel 2005;  
667 Nikula et al. 2013), and migration of birds (Schlichting 1960; Proctor 1966; Foissner 2006).

668 Consistent with the nearly-neutral theory of molecular evolution (Kimura 1983), only a few  
669 genes were found to be under strong selection pressure across all the ecotypes. A remarkably  
670 high expression and selection pressure of the MetH gene suggests a strong adaptive selection  
671 within laboratory-maintained ecotype strains. Since all the ecotype strains share similar  
672 microenvironments in their respective natural niches, most of the genes that are under strong  
673 selection pressure are shared among different ecotypes. However, a few characteristic gene  
674 families are observed to be under selection specifically within individual haplogroups. These  
675 species complexes are further supported by functional specialization of individual groups,  
676 nicely illustrated with Pt4 in haplogroup B. Pt4 shows a low non-photochemical quenching

677 capacity (NPQ) (Bailleul et al. 2010), which is suggested as an adaptive trait to low light  
678 conditions. Specifically, this ecotype has been proposed to have established an upregulation  
679 of a peculiar light harvesting protein LHCX4 in extended dark conditions (Bailleul et al. 2010;  
680 Taddei et al. 2016). In line with these observations, a gene involved in nitrate assimilation  
681 (Phatr3\_EG02286) in haplogroup B shows high copy numbers, suggesting an altered mode of  
682 nutrient acquisition within this haplogroup. Nitrate assimilation was shown to be regulated  
683 extensively under low light or dark conditions to overcome nitrate limitation of growth in  
684 *Thalassiosira weissflogii* (Clark et al. 2002). Pt4 is well adapted to its low light ambient  
685 environment which may well affect nitrate assimilation capacity (Ivanikova et al. 2005;  
686 Weiguo Li 2011) and thus the growth rate of the strain in different conditions. Similarly, a gene  
687 encoding an amino acid transporter (Phatr3\_J50146) was found to be positively selected in  
688 Pt4, further suggesting a role in nutrient uptake. Interestingly, a predicted seven  
689 transmembrane receptor (Phatr3\_J11183) belonging to the rhodopsin gene family is also  
690 observed to be under positive selection within Pt4 (haplogroup B) ecotype. It is tempting to  
691 speculate about its role in light perception and photo sensing in the low light environments at  
692 high latitudes. Furthermore, haplogroup C (Pt5 and Pt10) contains a protein with a possible  
693 role in adhesion, which is in line with the high adherence reported in Pt5 (Stanley 2007).  
694 Additional functions emerging from this haplogroup include vacuolar sorting and vesicle-  
695 mediated transport which could be an indication of altered intracellular trafficking (Pickett-  
696 Heaps and Forer 2001).

697 In conclusion, the study brings new insights to our understanding of diatom ecology and  
698 evolution. The study reveals the global distribution map of the best-studied model diatom  
699 species *P. tricornutum* and recovered global patterns of ancestral admixing between  
700 geographically distant ecotypes sampled at a broad temporal scale. As strains maintain high  
701 levels of heterozygosity, with possible selective functional preference of one allele over the  
702 other under different environmental conditions, the current study will be useful in

703 deciphering the mechanisms underpinning allele divergence and selection within diatoms,  
704 and help understand the genetic basis of their success in diverse ocean ecosystems. This study  
705 further provides the community with genomic sequences of *P. tricornutum* natural accessions  
706 that are valuable and will be undoubtedly used for functional studies.

707

## 708 **Methods**

709

### 710 **Sample preparation, sequencing and mapping**

711

712 Ten different accessions of *P. tricornutum* were obtained from the culture collections of the  
713 Provasoli-Guillard National Center for Culture of Marine Phytoplankton (CCMP,  
714 Pt1=CCMP632, Pt5=CCMP630, Pt6=CCMP631, Pt7=CCMP1327, Pt9=CCMP633), the Culture  
715 Collection of Algae and Protozoa (CCAP, Pt2=CCAP 1052/1A, Pt3= CCAP 1052/1B, Pt4= CCAP  
716 1052/6), the Canadian Center for the Culture of Microorganisms (CCCM, Pt8=NEPCC 640), and  
717 the Microalgae Culture Collection of Qingdao University (MACC, Pt10=MACC B228). All of the  
718 accessions were grown axenically in batch cultures with a photon fluency rate of 75  $\mu\text{mol}$   
719  $\text{photons m}^{-2} \text{ s}^{-1}$  provided by cool-white fluorescent tubes in a 12:12 light: dark (L:D)  
720 photoperiod at 20 °C. Exponentially growing cells were harvested and total DNA was extracted  
721 with the cetyltrimethylammonium bromide (CTAB) method. At least 6  $\mu\text{g}$  of genomic DNA  
722 from each accession was used to construct a sequencing library following the manufacturer's  
723 instructions (Illumina Inc.). Paired-end sequencing libraries with a read size of 100 bp and an  
724 insert size of approximately 400 bp were sequenced on an Illumina HiSeq 2000 sequencer at  
725 Berry Genomics Company (China). Low quality read-pairs were discarded using FASTQC with  
726 a read quality (Phred score) cutoff of 30. Using the genome assembly published in 2008 as  
727 reference (Bowler et al. 2008), we performed reference-assisted assembly of all the ecotypes.

728 We used BOWTIE (-n 2 -X 400) for mapping the high quality NGS reads to the reference  
729 genome followed by the processing and filtering of the alignments using SAMTOOLS and  
730 BEDTOOLS. Detailed methods are provided in File S6.

731

### 732 **Discovery of small polymorphisms and large structural variants**

733

734 GATK (McKenna et al. 2010), configured for diploid genomes, was used for variant calling,  
735 which included single nucleotide polymorphisms (SNVs), small insertions and deletions  
736 ranging between 1 and 300 base pairs (bp). The genotyping mode was kept default  
737 (genotyping mode = DISCOVERY), Emission confidence threshold (-stand\_emit\_conf) was kept  
738 10 and calling confidence threshold (-stand\_call\_conf) was kept at 30. The minimum number  
739 of reads per base, to be called as a high quality SNV, was kept to 4 (read-depth  $\geq 4x$ ).

740 Next, considering Z-score as a normalized measure of read-depth, gene and TE candidates  
741 showing multiple copies (representing CNV) or apparently being lost (representing gene loss)  
742 were determined. For TE CNV analysis, TEs (from current annotation version Phatr3, (Rastogi  
743 et al. Submitted)) that are more than 100 bp lengths were considered. We measured the fold-  
744 change (Fc) by dividing normalized read depth per genomic feature (Z-score per gene or TE)  
745 by average of normalized read depth of all the genes/TEs(average Z-score), per sample. Later  
746 genes or TEs with log<sub>2</sub> scaled fold change  $\geq 2$  were reported and considered to exist in more  
747 than one copy in the genome. Genes where the reads from individual ecotype sequencing  
748 library failed to map on the reference genome were considered as potentially lost within that  
749 ecotype and reported. Detailed method is provided in File S6. Later, some randomly chosen  
750 loci were picked and validated to be lost in the ecotypes compared to the reference genome  
751 by qPCR analysis.

752

### 753 **Validation of gene loss and quantitative PCR analysis**



754

755 In order to validate gene loss, DNA was extracted from all the ecotypes as described previously  
 756 (Falciatore et al. 1999) and PCR was performed with the primers listed in Table S1. PCR  
 757 products were loaded in 1% agarose gel and after migration gels were exposed to UV light and  
 758 photographs were taken using a gel documentation apparatus to visualize the presence and  
 759 absence of amplified fragment. To assess gene expression, RNA was extracted as described  
 760 in (Siaut et al. 2007) from ecotypes grown axenically in Artificial Sea Water (ASW) (Vartanian  
 761 et al. 2009) supplemented with vitamins as well as in the presence of their endemic bacteria  
 762 in ASW without vitamins. qPCR was performed as described previously (Siaut et al. 2007).

| gene ID        | forward primer        | reverse primer        | fragment length (bp) |
|----------------|-----------------------|-----------------------|----------------------|
| Phatr3_EG00392 | AGCATTGTAATGCGGAAC    | GAAGATCTCTCCGGGACTC   | 509                  |
| Phatr3_J13031  | ATTCACAGACAATGCCGAAT  | GGGGGCTAAGAGCTTACAAC  | 411                  |
| Phatr3_J15301  | CCGTCATCAACAAAAACACA  | ATGCAAGGAGCATTTTTTCAG | 422                  |
| Phatr3_J39504  | TCGCGAATAACTCACAGTCA  | TCTTGGAAATACTTCGGCTTG | 412                  |
| Phatr3_J40834  | AGTGCATCGAAAGTCTGGAG  | GTTACAGGGTGCCTTTTTTA  | 403                  |
| Phatr3_J41518  | GACAACTTGTCGTGGCTTT   | CAAAGTACTCGGCTCCTTCA  | 427                  |
| Phatr3_J42255  | CGTTCCTGGATTGAAAAATG  | CCAATGAAGCTGCAGAAGAT  | 433                  |
| Phatr3_J42686  | GCAGTCTTTCAAGCGAGTC   | CTAACCTTTCGACGAACAT   | 409                  |
| Phatr3_J43417  | TGAGTACGAGGCAAGTGTC   | CCAAAGGAATTGAGCGTAGA  | 429                  |
| Phatr3_J45389  | CAGAAGTAGTTCCCCGACGA  | GCTCTGGCTTGTCTGCTAC   | 418                  |
| Phatr3_J46603  | ACCAACGGCTGTATGTGTTT  | TCCAGCTCCGTTTTGTAAAG  | 429                  |
| Phatr3_J46954  | TTACATGATGGCTGGGAAGT  | GACTCAACAACATCCCGTTC  | 443                  |
| Phatr3_J47779  | GGACAATCAGACCCATTACG  | GACCGTTCATCATTCTGAG   | 443                  |
| Phatr3_J47781  | AGCATGATTCTAGCCGACAC  | CCCAATCATTGATGAAAGC   | 414                  |
| Phatr3_J47783  | CTCATTCCCTTAGCCGACGTA | CATTGTTACCCGAAACGAC   | 441                  |
| Phatr3_J47785  | GATTGGCAGGATTGCTCTAA  | CTATGGCTTGCACTTCTGT   | 445                  |
| Phatr3_J47798  | GCAGATCTGGAAGAAAACGA  | ATGTTCTCCGCATCCAATAA  | 435                  |
| Phatr3_J48335  | AAGCCTTTCACATGCTTCAC  | ACTAACGIGCCATTGAGAGC  | 430                  |
| Phatr3_J48801  | AGGAATTCCTGTAGGAACG   | CCTGCATAGCCTTGTATGCT  | 411                  |
| Phatr3_J49108  | CTCACACCTTCGAAAAAGT   | AATGGATTTCTTCCCTTTGG  | 402                  |
| Phatr3_J54981  | GACGCGACTTTCAAAACAGT  | CATGAAGCTAAGGGCGTAAA  | 412                  |

763

764 **Table S1.** List of PCR primers used to validate the gene loss candidates (listed in column 1).  
 765

766 ***P. tricornutum* population structure**

767

768 ***Haplotype analysis:*** First, to cluster the ecotypes as haplogroups, ITS2 gene (chr13: 42150-  
 769 43145) and 18S gene (chr13: 43553-45338) were used. Polymorphic sites across all the  
 770 ecotypes within ITS2 and 18S genes were called and used to generate their corresponding

771 ecotype specific sequences, which were then aligned using CLUSTALW. The same approach  
772 was employed to perform haplotype analysis at the whole genome scale. Later, a maximum  
773 likelihood algorithm was used to generate the 18S, ITS2 and, whole genome tree with  
774 bootstrap values of 1,000. We used MEGA7 (Kumar et al. 2016) to align and deduce the  
775 phylogenetic trees.

776

777 **CBC analysis:** CBC analysis was done by generating the secondary structure of ITS2 sequences,  
778 using RNAfold (Lorenz et al. 2011), across all *P. tricornutum* ecotypes and other diatom  
779 species. The other species include one centric diatom species *Cyclotella meneghiniana*  
780 (AY906805.1), and three pennate diatoms *Pseudo-nitzschia delicatissima* (EU478789.1),  
781 *Pseudo-nitzschia multiseriata* (DQ062664.1), *Fragilariopsis cylindrus* (EF660056.1). The  
782 centroid secondary structures of ITS2 gene with lowest minimum free energy was used for CBC  
783 analysis. We used 4SALE (Seibel et al. 2006) for estimating the presence of CBCs between the  
784 secondary structure of ITS2 gene across all the species.

785

786 **Population genetics:** Further, we measured various population genetic functions to estimate  
787 the effect of evolutionary pressure in shaping the diversity and resemblance between  
788 different ecotype populations. Within individual ecotypes, by using approximate allelic depths  
789 of reference/alternate alleles, we calculated the alleles that are deviated from Hardy  
790 Weinberg equilibrium (HWE). We used chi-square estimation to evaluate alleles observed to  
791 deviate significantly ( $P$ -value  $< 0.05$ ) from the expected proportion as per  $[p^2$  (homozygous) +  
792  $2pq$  (heterozygous) +  $q^2$  (homozygous) = 1) and should be 0.25% + 0.50% + 0.25%. Alleles were  
793 considered heterozygous if the proportion of ref/alt allele is between 20-80%. The proportion  
794 of ref/alt allele was calculated by dividing the number of reads supporting ref/alt base change  
795 by total number of reads mapped at the position. We evaluated average  $R^2$  as a function to  
796 measure the linkage disequilibrium with increasing distance (1 kb, 5 kb, 10 kb, 20 kb, 30 kb,

797 40 kb and 50 kb) between any given pair of mutant alleles across all the ecotypes using  
798 expectation-maximization (EM) algorithm deployed in the VCFtools. Although no  
799 recombination was observed within the ecotypes, attempts were made to look for  
800 recombination signals using LDhat (Auton and McVean 2007) and RAT (Etherington et al.  
801 2005). Again using VCFtools, Nucleotide diversity ( $\pi$ ) was estimated in a 1 kb non-overlapping  
802 window along the whole genome across all the ecotypes, using the method described by (Nei  
803 and Li 1979). Genetic differentiation or variability between the ecotypes was further assessed  
804 using the mathematical function of Fixation index ( $F_{ST}$ ), as described by Wright in 1931, as  
805 also stated in (Whitlock and McCauley 1999; Rottenstreich et al. 2007). We estimated  $F_{ST}$  as  
806 a function to measure, mathematically, the similarity between different pairs of ecotypes  
807 sharing multiple SNV positions using the following formula,  $F_{ST} = \frac{H_p - H_e}{H_p}$ , where  $H_p$  and  $H_e$   
808 represent the total number of polymorphic positions between any given pair of ecotypes and  
809 number of total polymorphic sites within an individual ecotype, respectively.

810

811 **Admixture analysis:** Ancestral admixture within ecotypes was estimated using ADMIXTURE  
812 (version linux-1.3.0) (Alexander et al. 2009), PLINK (version 1.07-x86\_64) (Purcell et al. 2007)  
813 and VCFtools (version 0.1.13) (Danecek et al. 2011). In the absence of data from individuals of  
814 each ecotype/sample, we assumed the behavior of each individual in a sample to be coherent.  
815 Conclusively, instead of estimating the genetic structure within an ecotype, we compared it  
816 across all the ecotypes. Using VCFtools and PLINK to format the VCF file, containing variant  
817 information of all the ecotypes, to ADMIXTURE accepted format, we first estimated the  
818 possible number of ancestral populations (K) by using cross-validation error (CV error)  
819 function of ADMIXTURE (Alexander and Lange 2011). Finally, we used ADMIXTURE with 200  
820 bootstraps, to estimate the admixing within individual ecotypes by considering the number of  
821 ancestral populations derived via CV-error function.

822

823 **Distribution of *P. tricornutum* sequences in Tara Oceans meta-genomics (MetaG) and meta-**

824 **transcriptomics (MetaT) datasets:** Distribution was estimated using the assembled *Tara*

825 Oceans unigenes from meta-genomics (metaG) and meta-transcriptomics (metaT) read data

826 (Carradec et al. Under revision). We used the Lowest Common Ancestor (LCA) algorithm

827 (Garcia-Etxebarria et al. 2014) to classify unigenes according to the highest score BLAST

828 (Altschul et al. 1990) hits (at least 50% of coverage and 3 orders of magnitude under the best

829 hit). The BLAST reference database was composed of PhyloDB release 1.076 (Dupont et al.

830 2015). The abundance of each *P. tricornutum*-assigned unigene is relative to the abundance

831 of all the Bacillariophyta assigned unigenes. PhyloDB contains only one reference for genus

832 *Phaeodactylum* compared to 12 reference species of *Skeletonema* and 11 reference species

833 of *Pseudo-nitzschia*. Therefore, the relative abundances of *Skeletonema* and *Pseudo-nitzschia*

834 assigned unigenes were further normalized with the total number of references from them in

835 PhyloDB. From all the size fractions sampled during *Tara* Oceans expeditions (Karsenti et al.

836 2011), we considered analyzing data corresponding to size fraction 0.8 - 5 micrometers for *P.*

837 *tricornutum*, 5 – 20 micrometers for *Skeletonema*, and 20 – 180 micrometers for *Pseudo-*

838 *nitzschia*. Detailed methods are provided in File S6.

839

840 **Functional characterization of polymorphisms**

841

842 snpEff (Cingolani et al. 2012) and KaKs (Zhang et al. 2006) calculator were used to annotate

843 the functional nature of the polymorphisms. Along with the non-synonymous, synonymous,

844 loss-of-function (LOF) alleles, transition to transversion ratio and mutational spectrum of the

845 single nucleotide polymorphisms were also measured. Genes with Ka/Ks also known as dN/dS

846 ratio more than 1 with a p-value less than 0.05 are considered as undergoing natural or

847 Darwinian selection. Various in-house scripts were also used at different levels for analysis

848 and for plotting graphs. Data visualization and graphical analysis were performed principally  
849 using ClicO (Cheong et al. 2015), CYTOSCAPE (Shannon et al. 2003), IGV (Robinson et al. 2011)  
850 and R (<https://www.r-project.org/about.html>). Based on the presence of functional domains  
851 all the Phatr3 genes ([http://protists.ensembl.org/Phaeodactylum\\_tricornutum/Info/Index](http://protists.ensembl.org/Phaeodactylum_tricornutum/Info/Index))  
852 were grouped into 3,020 gene families. Subsequently, the constituents of each gene family  
853 was checked for being either affected by loss-of-function mutations or experiencing natural  
854 selection. To estimate an unbiased effect of any evolutionary pressure (LoF allele or Positive  
855 selection mutations) on different gene families, induced because of high functional  
856 redundancies in the gene families, a normalized ratio named as effect ratio (EfR), was  
857 calculated. Precisely, the EfR normalizes the fact that if any gene family have enough  
858 candidates to buffer the effect on some genes influencing evolutionary pressures, it will be  
859 considered as less affected compared to the situation where all or most of the constituents  
860 are under selection pressure. The ratio was estimated as shown below and gene families with  
861 EfR larger than 1 were considered as being significantly affected.

$$862 \quad \text{Effect Ratio (EfR)} = \frac{\frac{\text{Number of genes affected within the given gene family}}{\text{Total number of genes in the given gene family}}}{\frac{\text{Total number of genes affected in all the gene families}}{\text{Total number of genes in all the gene families}}}$$

863  
864 Additionally, significantly enriched (chi-square test, P-value < 0.05) biological processes  
865 associated within genes experiencing LoF mutations, natural selection (PoS), or showing CNV,  
866 or being lost (GnL), were estimated by calculating observed to expected ratio of their percent  
867 occurrence within the given functional set (PoS, LoF, CNV, LoF) and their occurrence in the  
868 complete annotated Phatr3 ([http://protists.ensembl.org/Phaeodactylum\\_tricornutum](http://protists.ensembl.org/Phaeodactylum_tricornutum/Info/Index)  
869 [/Info/Index](http://protists.ensembl.org/Phaeodactylum_tricornutum/Info/Index)) (Rastogi et al. Submitted) biological process catalog. Later, considering gene  
870 family EfR as a function to measure the association rate, we deduced Pearson pairwise  
871 correlations between different ecotypes. The correlation matrix describes that if many equally

872 affected gene families are shared between any given pair of ecotypes, they will have higher  
873 correlation compared to others. Finally, hierarchical clustering using Pearson pairwise  
874 correlation matrix assessed the association between the ecotypes.

875

## 876 **Acknowledgements**

877 CB acknowledges funding from the ERC Advanced Award 'Diatomite', the LouisD Foundation  
878 of the Institut de France, the Gordon and Betty Moore Foundation, and the French  
879 Government 'Investissements d'Avenir' programmes MEMO LIFE (ANR-10-LABX-54), PSL\*  
880 Research University (ANR-1253 11-IDEX-0001-02), and OCEANOMICS (ANR-11-BTBR-0008).  
881 CB also thanks the Radcliffe Institute of Advanced Study at Harvard University for a scholar's  
882 fellowship during the 2016-2017 academic year. AR was supported by an International PhD  
883 fellowship from MEMO LIFE (ANR-10-LABX-54).

884

## 885 **Conflict of interest**

886 The authors declare no conflicts of interest.

887

## 888 **References**

- 889 Abida H, Dolch LJ, Mei C, Villanova V, Conte M, Block MA, Finazzi G, Bastien O,  
890 Tirichine L, Bowler C et al. 2015. Membrane glycerolipid remodeling  
891 triggered by nitrogen and phosphorus starvation in *Phaeodactylum*  
892 *tricornutum*. *Plant physiology* **167**: 118-136.
- 893 Alexander DH, Lange K. 2011. Enhancements to the ADMIXTURE algorithm for  
894 individual ancestry estimation. *BMC bioinformatics* **12**: 246.
- 895 Alexander DH, Novembre J, Lange K. 2009. Fast model-based estimation of  
896 ancestry in unrelated individuals. *Genome Res* **19**: 1655-1664.
- 897 Allen AE, Dupont CL, Obornik M, Horak A, Nunes-Nesi A, McCrow JP, Zheng H,  
898 Johnson DA, Hu H, Fernie AR et al. 2011. Evolution and metabolic  
899 significance of the urea cycle in photosynthetic diatoms. *Nature* **473**: 203-  
900 207.
- 901 Altschul SF, Gish W, Miller W, Myers EW, Lipman DJ. 1990. Basic local alignment  
902 search tool. *J Mol Biol* **215**: 403-410.
- 903 Armbrust EV. 2009. The life of diatoms in the world's oceans. *Nature* **459**: 185-  
904 192.

- 905 Auton A, McVean G. 2007. Recombination rate estimation in the presence of  
906 hotspots. *Genome Res* **17**: 1219-1227.
- 907 Bailleul B, Rogato A, de Martino A, Coesel S, Cardol P, Bowler C, Falciatore A,  
908 Finazzi G. 2010. An atypical member of the light-harvesting complex stress-  
909 related protein family modulates diatom responses to light. *Proceedings of*  
910 *the National Academy of Sciences of the United States of America* **107**:  
911 18214-18219.
- 912 Becker C, Hagmann J, Muller J, Koenig D, Stegle O, Borgwardt K, Weigel D. 2011.  
913 Spontaneous epigenetic variation in the *Arabidopsis thaliana* methylome.  
914 *Nature* **480**: 245-249.
- 915 Bertrand EM, Allen AE, Dupont CL, Norden-Krichmar TM, Bai J, Valas RE, Saito MA.  
916 2012. Influence of cobalamin scarcity on diatom molecular physiology and  
917 identification of a cobalamin acquisition protein. *Proceedings of the*  
918 *National Academy of Sciences of the United States of America* **109**: E1762-  
919 1771.
- 920 Blanc-Mathieu R, Verhelst B, Derelle E, Rombauts S, Bouget FY, Carre I, Chateau A,  
921 Eyre-Walker A, Grimsley N, Moreau H et al. 2014. An improved genome of  
922 the model marine alga *Ostreococcus tauri* unfolds by assessing Illumina de  
923 novo assemblies. *BMC genomics* **15**: 1103.
- 924 Bowler C, Allen AE, Badger JH, Grimwood J, Jabbari K, Kuo A, Maheswari U,  
925 Martens C, Maumus F, Otilar RP et al. 2008. The *Phaeodactylum* genome  
926 reveals the evolutionary history of diatom genomes. *Nature* **456**: 239-244.
- 927 Cao J, Schneeberger K, Ossowski S, Gunther T, Bender S, Fitz J, Koenig D, Lanz C,  
928 Stegle O, Lippert C et al. 2011. Whole-genome sequencing of multiple  
929 *Arabidopsis thaliana* populations. *Nature genetics* **43**: 956-963.
- 930 Carradec Q, Pelletier E, Da Silva C, Alberti A, Seeleuthner Y, Blanc-Mathieu R, Lima-  
931 Mendez G, Rocha F, Tirichine L, Labadie K et al. Under revision. A global  
932 ocean atlas of eukaryotic genes. *Nature*.
- 933 Casteleyn G, Leliaert F, Backeljau T, Debeer AE, Kotaki Y, Rhodes L, Lundholm N,  
934 Sabbe K, Vyverman W. 2010. Limits to gene flow in a cosmopolitan marine  
935 planktonic diatom. *Proceedings of the National Academy of Sciences of the*  
936 *United States of America* **107**: 12952-12957.
- 937 Cermeno P, Falkowski PG. 2009. Controls on diatom biogeography in the ocean.  
938 *Science* **325**: 1539-1541.
- 939 Cheong WH, Tan YC, Yap SJ, Ng KP. 2015. ClicO FS: an interactive web-based  
940 service of Circos. *Bioinformatics* **31**: 3685-3687.
- 941 Chepurnov VA, Mann DG, Sabbe K, Vyverman W. 2004. Experimental studies on  
942 sexual reproduction in diatoms. *Int Rev Cytol* **237**: 91-154.
- 943 Chepurnov VA, Mann DG, Vyverman W, Sabbe K, Danielidis DB. 2002. Sexual  
944 reproduction, mating system, and protoplast dynamics of *Seminavis*  
945 (*Bacillariophyceae*). *Journal of Phycology* **38**: 1004-1019.
- 946 Chu JH, Wegmann D, Yeh CF, Lin RC, Yang XJ, Lei FM, Yao CT, Zou FS, Li SH. 2013.  
947 Inferring the geographic mode of speciation by contrasting autosomal and  
948 sex-linked genetic diversity. *Mol Biol Evol* **30**: 2519-2530.
- 949 Cingolani P, Platts A, Wang le L, Coon M, Nguyen T, Wang L, Land SJ, Lu X, Ruden  
950 DM. 2012. A program for annotating and predicting the effects of single  
951 nucleotide polymorphisms, SnpEff: SNPs in the genome of *Drosophila*  
952 *melanogaster* strain w1118; iso-2; iso-3. *Fly (Austin)* **6**: 80-92.



- 953 Clark DP, Flynn KJ, Ownes NJ. 2002. The large capacity for dark nitrate-  
954 assimilation in diatoms may overcome nitrate limitation of growth. *New*  
955 *Phytologist* doi:10.1046/j.1469-8137.2002.00435.x.
- 956 Crow JF. 2005. Timeline: Hermann Joseph Muller, evolutionist. *Nature reviews*  
957 *Genetics* **6**: 941-945.
- 958 Danecek P, Auton A, Abecasis G, Albers CA, Banks E, DePristo MA, Handsaker RE,  
959 Lunter G, Marth GT, Sherry ST et al. 2011. The variant call format and  
960 VCFtools. *Bioinformatics* **27**: 2156-2158.
- 961 Davidovich NA, Bates SS. 1998. Sexual reproduction in the pennate diatoms  
962 *Pseudo-nitzschia multiseries* and *P-pseudodelicatissima*  
963 (*Bacillariophyceae*). *Journal of Phycology* **34**: 126-137.
- 964 Davidovich NA, Kaczmarek I, Karpov SA, Davidovich OI, MacGillivray ML, Mather  
965 L. 2012. Mechanism of male gamete motility in araphid pennate diatoms  
966 from the genus *Tabularia* (*Bacillariophyta*). *Protist* **163**: 480-494.
- 967 De Martino AM, A. Juan Shi, K.P. Bowler, C. 2007. Genetic and phenotypic  
968 characterization of *Phaeodactylum tricornutum* (*Bacillariophyceae*)  
969 accessions. *J Phycol* **43**: 992-1009.
- 970 De Riso V, Raniello R, Maumus F, Rogato A, Bowler C, Falciatore A. 2009. Gene  
971 silencing in the marine diatom *Phaeodactylum tricornutum*. *Nucleic acids*  
972 *research* **37**: e96.
- 973 de Vargas C, Norris R, Zaninetti L, Gibb SW, Pawlowski J. 1999. Molecular evidence  
974 of cryptic speciation in planktonic foraminifers and their relation to  
975 oceanic provinces. *Proceedings of the National Academy of Sciences of the*  
976 *United States of America* **96**: 2864-2868.
- 977 Diner RE, Bielinski VA, Dupont CL, Allen AE, Weyman PD. 2016. Refinement of the  
978 Diatom Episome Maintenance Sequence and Improvement of Conjugation-  
979 Based DNA Delivery Methods. *Front Bioeng Biotechnol* **4**: 65.
- 980 Dorak M. 2014. Basic population genetics.
- 981 Dorrell RG, Gile G, McCallum G, Meheust R, Baptiste EP, Klinger CM, Brillet-  
982 Gueguen L, Freeman KD, Richter DJ, Bowler C. 2017. Chimeric origins of  
983 ochrophytes and haptophytes revealed through an ancient plastid  
984 proteome. *Elife* **6**.
- 985 Dupont CL, McCrow JP, Valas R, Moustafa A, Walworth N, Goodenough U, Roth R,  
986 Hogle SL, Bai J, Johnson ZI et al. 2015. Genomes and gene expression across  
987 light and productivity gradients in eastern subtropical Pacific microbial  
988 communities. *ISME J* **9**: 1076-1092.
- 989 Etherington GJ, Dicks J, Roberts IN. 2005. Recombination Analysis Tool (RAT): a  
990 program for the high-throughput detection of recombination.  
991 *Bioinformatics* **21**: 278-281.
- 992 Falciatore A, Casotti R, Leblanc C, Abrescia C, Bowler C. 1999. Transformation of  
993 Nonselectable Reporter Genes in Marine Diatoms. *Mar Biotechnol (NY)* **1**:  
994 239-251.
- 995 Ferreira A, Marguti I, Bechmann I, Jeney V, Chora A, Palha NR, Rebelo S, Henri A,  
996 Beuzard Y, Soares MP. 2011. Sickle hemoglobin confers tolerance to  
997 Plasmodium infection. *Cell* **145**: 398-409.
- 998 Finlay BJ. 2002. Global dispersal of free-living microbial eukaryote species. *Science*  
999 **296**: 1061-1063.
- 1000 Flowers JM, Hazzouri KM, Pham GM, Rosas U, Bahmani T, Khraiweh B, Nelson DR,  
1001 Jijakli K, Abdrabu R, Harris EH et al. 2015. Whole-Genome Resequencing



- 1002 Reveals Extensive Natural Variation in the Model Green Alga  
1003 *Chlamydomonas reinhardtii*. *The Plant cell* **27**: 2353-2369.
- 1004 Foissner W. 2006. Biogeography and Dispersal of Micro-organisms: A Review  
1005 Emphasizing Protists. *Acta Protozool* **45**: 111-136.
- 1006 Fortunato AE, Jaubert M, Enomoto G, Bouly JP, Raniello R, Thaler M, Malviya S,  
1007 Bernardes JS, Rappaport F, Gentili B et al. 2016. Diatom Phytochromes  
1008 Reveal the Existence of Far-Red-Light-Based Sensing in the Ocean. *The*  
1009 *Plant cell* **28**: 616-628.
- 1010 Garcia-Etxebarria K, Garcia-Garcera M, Calafell F. 2014. Consistency of  
1011 metagenomic assignment programs in simulated and real data. *BMC*  
1012 *bioinformatics* **15**: 90.
- 1013 Godhe A, Kremp A, Montresor M. 2014. Genetic and microscopic evidence for  
1014 sexual reproduction in the centric diatom *Skeletonema marinoi*. *Protist*  
1015 **165**: 401-416.
- 1016 Gu Z, Steinmetz LM, Gu X, Scharfe C, Davis RW, Li WH. 2003. Role of duplicate  
1017 genes in genetic robustness against null mutations. *Nature* **421**: 63-66.
- 1018 Harnstrom K, Ellegaard M, Andersen TJ, Godhe A. 2011. Hundred years of genetic  
1019 structure in a sediment revived diatom population. *Proceedings of the*  
1020 *National Academy of Sciences of the United States of America* **108**: 4252-  
1021 4257.
- 1022 Helliwell KE, Collins S, Kazamia E, Purton S, Wheeler GL, Smith AG. 2015.  
1023 Fundamental shift in vitamin B12 eco-physiology of a model alga  
1024 demonstrated by experimental evolution. *ISME J* **9**: 1446-1455.
- 1025 Helliwell KE, Wheeler GL, Leptos KC, Goldstein RE, Smith AG. 2011. Insights into  
1026 the evolution of vitamin B12 auxotrophy from sequenced algal genomes.  
1027 *Mol Biol Evol* **28**: 2921-2933.
- 1028 Hirakawa MP, Martinez DA, Sakthikumar S, Anderson MZ, Berlin A, Gujja S, Zeng  
1029 Q, Zisson E, Wang JM, Greenberg JM et al. 2015. Genetic and phenotypic  
1030 intra-species variation in *Candida albicans*. *Genome Res* **25**: 413-425.
- 1031 Huysman MJ, Fortunato AE, Matthijs M, Costa BS, Vanderhaeghen R, Van den Daele  
1032 H, Sachse M, Inze D, Bowler C, Kroth PG et al. 2013. AUREOCHROME1a-  
1033 mediated induction of the diatom-specific cyclin dsCYC2 controls the onset  
1034 of cell division in diatoms (*Phaeodactylum tricornutum*). *The Plant cell* **25**:  
1035 215-228.
- 1036 Huysman MJ, Martens C, Vandepoele K, Gillard J, Rayko E, Heijde M, Bowler C, Inze  
1037 D, Van de Peer Y, De Veylder L et al. 2010. Genome-wide analysis of the  
1038 diatom cell cycle unveils a novel type of cyclins involved in environmental  
1039 signaling. *Genome biology* **11**: R17.
- 1040 Ivanikova NV, McKay R, Bullerjahn GS. 2005. Construction and characterization of  
1041 a cyanobacterial bioreporter  
1042 capable of assessing nitrate assimilatory capacity in freshwaters. *Limnology and*  
1043 *Oceanography* **3**: 86-93.
- 1044 Kaczmarek I, Mather L, Luddington I, Muise F, Ehrman J. 2014. Cryptic diversity  
1045 in a cosmopolitan diatom known as *Asterionellopsis glacialis*  
1046 (*Fragilariaceae*): Implications for ecology, biogeography, and taxonomy.  
1047 *American Journal of Botany*.
- 1048 Kanai Y, Ushijima S, Tsuda H, Sakamoto M, Hirohashi S. 2000. Aberrant DNA  
1049 methylation precedes loss of heterozygosity on chromosome 16 in chronic  
1050 hepatitis and liver cirrhosis. *Cancer Lett* **148**: 73-80.

- 1051 Karsenti E, Acinas SG, Bork P, Bowler C, De Vargas C, Raes J, Sullivan M, Arendt D,  
1052 Benzoni F, Claverie JM et al. 2011. A holistic approach to marine eco-  
1053 systems biology. *PLoS Biol* **9**: e1001177.
- 1054 Kaur S, Spillane C. 2015. Reduction in carotenoid levels in the marine diatom  
1055 *Phaeodactylum tricornutum* by artificial microRNAs targeted against the  
1056 endogenous phytoene synthase gene. *Mar Biotechnol (NY)* **17**: 1-7.
- 1057 Kimura M. 1983. *The neutral theory of molecular evolution*. Cambridge University  
1058 Press.
- 1059 Kooistra WH, Sarno D, Balzano S, Gu H, Andersen RA, Zingone A. 2008. Global  
1060 diversity and biogeography of *Skeletonema* species (bacillariophyta).  
1061 *Protist* **159**: 177-193.
- 1062 Kumar S, Stecher G, Tamura K. 2016. MEGA7: Molecular Evolutionary Genetics  
1063 Analysis Version 7.0 for Bigger Datasets. *Mol Biol Evol* **33**: 1870-1874.
- 1064 Lescot M, Hingamp P, Kojima KK, Villar E, Romac S, Veluchamy A, Boccara M,  
1065 Jaillon O, Iudicone D, Bowler C et al. 2016. Reverse transcriptase genes are  
1066 highly abundant and transcriptionally active in marine plankton  
1067 assemblages. *ISME J* **10**: 1134-1146.
- 1068 Liti G. 2015. The fascinating and secret wild life of the budding yeast *S. cerevisiae*.  
1069 *Elife* **4**.
- 1070 Liti G, Carter DM, Moses AM, Warringer J, Parts L, James SA, Davey RP, Roberts IN,  
1071 Burt A, Koufopanou V et al. 2009. Population genomics of domestic and  
1072 wild yeasts. *Nature* **458**: 337-341.
- 1073 Lorenz R, Bernhart SH, Honer Zu Siederdisen C, Tafer H, Flamm C, Stadler PF,  
1074 Hofacker IL. 2011. ViennaRNA Package 2.0. *Algorithms Mol Biol* **6**: 26.
- 1075 Maheswari U, Jabbari K, Petit JL, Porcel BM, Allen AE, Cadoret JP, De Martino A,  
1076 Heijde M, Kaas R, La Roche J et al. 2010. Digital expression profiling of novel  
1077 diatom transcripts provides insight into their biological functions. *Genome*  
1078 *biology* **11**: R85.
- 1079 Maheswari U, Mock T, Armbrust EV, Bowler C. 2009. Update of the Diatom EST  
1080 Database: a new tool for digital transcriptomics. *Nucleic acids research* **37**:  
1081 D1001-1005.
- 1082 Malviya S, Scalco E, Audic S, Vincent F, Veluchamy A, Poulain J, Wincker P, Iudicone  
1083 D, de Vargas C, Bittner L et al. 2016. Insights into global diatom distribution  
1084 and diversity in the world's ocean. *Proceedings of the National Academy of*  
1085 *Sciences of the United States of America* doi:10.1073/pnas.1509523113.
- 1086 Matuszewski S, Hermisson J, Kopp M. 2015. Catch Me if You Can: Adaptation from  
1087 Standing Genetic Variation to a Moving Phenotypic Optimum. *Genetics* **200**:  
1088 1255-1274.
- 1089 McKenna A, Hanna M, Banks E, Sivachenko A, Cibulskis K, Kernytsky A, Garimella  
1090 K, Altshuler D, Gabriel S, Daly M et al. 2010. The Genome Analysis Toolkit:  
1091 a MapReduce framework for analyzing next-generation DNA sequencing  
1092 data. *Genome Res* **20**: 1297-1303.
- 1093 Medlin LK. 2015. A timescale for diatom evolution based on four molecular  
1094 markers: reassessment of ghost lineages and major steps defining diatom  
1095 evolution. *Vie Milieu / Life & Environment*.
- 1096 Mock T, Otiillar RP, Strauss J, McMullan M, Paajanen P, Schmutz J, Salamov A,  
1097 Sanges R, Toseland A, Ward BJ et al. 2017. Evolutionary genomics of the  
1098 cold-adapted diatom *Fragilariopsis cylindrus*. *Nature* **541**: 536-540.

- 1099 Morrissey J, Sutak R, Paz-Yepes J, Tanaka A, Moustafa A, Veluchamy A, Thomas Y,  
1100 Botebol H, Bouget FY, McQuaid JB et al. 2015. A novel protein, ubiquitous  
1101 in marine phytoplankton, concentrates iron at the cell surface and  
1102 facilitates uptake. *Current biology : CB* **25**: 364-371.
- 1103 Mouget J-L, RGastineau R, Davidovich O, Gaudin P, Davidovich NA. 2009. Light is a  
1104 key factor in triggering sexual reproduction in the pennate diatom *Haslea*  
1105 *ostrearia*. *FEMS Microbial Ecology*.
- 1106 Moustafa A, Beszteri B, Maier UG, Bowler C, Valentin K, Bhattacharya D. 2009.  
1107 Genomic footprints of a cryptic plastid endosymbiosis in diatoms. *Science*  
1108 **324**: 1724-1726.
- 1109 Nei M, Li WH. 1979. Mathematical model for studying genetic variation in terms  
1110 of restriction endonucleases. *Proceedings of the National Academy of*  
1111 *Sciences of the United States of America* **76**: 5269-5273.
- 1112 Nielsen R, Yang Z. 1998. Likelihood models for detecting positively selected amino  
1113 acid sites and applications to the HIV-1 envelope gene. *Genetics* **148**: 929-  
1114 936.
- 1115 Nikula R, Spencer HG, Waters JM. 2013. Passive rafting is a powerful driver of  
1116 transoceanic gene flow. *Biol Lett* **9**: 20120821.
- 1117 Nymark M, Sharma AK, Sparstad T, Bones AM, Winge P. 2016. A CRISPR/Cas9  
1118 system adapted for gene editing in marine algae. *Sci Rep* **6**: 24951.
- 1119 Patil S, Moeys S, von Dassow P, Huysman MJ, Mapleson D, De Veylder L, Sanges R,  
1120 Vyverman W, Montresor M, Ferrante MI. 2015. Identification of the meiotic  
1121 toolkit in diatoms and exploration of meiosis-specific SPO11 and RAD51  
1122 homologs in the sexual species *Pseudo-nitzschia multistriata* and  
1123 *Seminavis robusta*. *BMC genomics* **16**: 930.
- 1124 Pickett-Heaps JD, Forer A. 2001. Pac-Man does not resolve the enduring problem  
1125 of anaphase chromosome movement. *Protoplasma* **215**: 16-20.
- 1126 Piganeau G, Eyre-Walker A, Jancek S, Grimsley N, Moreau H. 2011. How and why  
1127 DNA barcodes underestimate the diversity of microbial eukaryotes. *PloS*  
1128 *one* **6**: e16342.
- 1129 Proctor VW. 1966. Dispersal of Desmids by birds. *Phycologia* **5**: 227-232.
- 1130 Purcell S, Neale B, Todd-Brown K, Thomas L, Ferreira MA, Bender D, Maller J, Sklar  
1131 P, de Bakker PI, Daly MJ et al. 2007. PLINK: a tool set for whole-genome  
1132 association and population-based linkage analyses. *American journal of*  
1133 *human genetics* **81**: 559-575.
- 1134 Rabosky DL, Sorhannus U. 2009. Diversity dynamics of marine planktonic diatoms  
1135 across the Cenozoic. *Nature* **457**: 183-186.
- 1136 Rahbari R, Wuster A, Lindsay SJ, Hardwick RJ, Alexandrov LB, Al Turki S,  
1137 Dominiczak A, Morris A, Porteous D, Smith B et al. 2016. Timing, rates and  
1138 spectra of human germline mutation. *Nature genetics* **48**: 126-133.
- 1139 Rastogi A, Maheswari U, Dorrell RG, Maumus F, Kustka A, McCarthy J, Allen AE,  
1140 Kersey P, Bowler C, Tirichine L. Submitted. Integrative analysis of large  
1141 scale transcriptome data draws a comprehensive landscape of  
1142 *Phaeodactylum tricornutum* genome and evolutionary origin of diatoms.
- 1143 Rastogi A, Murik O, Bowler C, Tirichine L. 2016. PhytoCRISP-Ex: a web-based and  
1144 stand-alone application to find specific target sequences for CRISPR/CAS  
1145 editing. *BMC bioinformatics* **17**: 261.

- 1146 Robinson JT, Thorvaldsdottir H, Winckler W, Guttman M, Lander ES, Getz G,  
1147 Mesirov JP. 2011. Integrative genomics viewer. *Nature biotechnology* **29**:  
1148 24-26.
- 1149 Rottenstreich S, Hamilton MB, Miller JR. 2007. Dynamics of Fst for the island  
1150 model. *Theor Popul Biol* **72**: 485-503.
- 1151 Saez AG, Probert I, Geisen M, Quinn P, Young JR, Medlin LK. 2003. Pseudo-cryptic  
1152 speciation in coccolithophores. *Proceedings of the National Academy of  
1153 Sciences of the United States of America* **100**: 7163-7168.
- 1154 Schlichting HE. 1960. The rôle of waterfowl in the dispersal of algae. *Trans Am  
1155 Microsc  
1156 Soc* **79**: 160-166.
- 1157 Seibel PN, Muller T, Dandekar T, Schultz J, Wolf M. 2006. 4SALE--a tool for  
1158 synchronous RNA sequence and secondary structure alignment and  
1159 editing. *BMC bioinformatics* **7**: 498.
- 1160 Sellis D, Callahan BJ, Petrov DA, Messer PW. 2011. Heterozygote advantage as a  
1161 natural consequence of adaptation in diploids. *Proceedings of the National  
1162 Academy of Sciences of the United States of America* **108**: 20666-20671.
- 1163 Sellis D, Kvitek DJ, Dunn B, Sherlock G, Petrov DA. 2016. Heterozygote Advantage  
1164 Is a Common Outcome of Adaptation in *Saccharomyces cerevisiae*. *Genetics*  
1165 **203**: 1401-1413.
- 1166 Shannon P, Markiel A, Ozier O, Baliga NS, Wang JT, Ramage D, Amin N,  
1167 Schwikowski B, Ideker T. 2003. Cytoscape: a software environment for  
1168 integrated models of biomolecular interaction networks. *Genome Res* **13**:  
1169 2498-2504.
- 1170 Shoemaker R, Deng J, Wang W, Zhang K. 2010. Allele-specific methylation is  
1171 prevalent and is contributed by CpG-SNPs in the human genome. *Genome  
1172 Res* **20**: 883-889.
- 1173 Siaut M, Heijde M, Mangogna M, Montsant A, Coesel S, Allen A, Manfredonia A,  
1174 Falciatore A, Bowler C. 2007. Molecular toolbox for studying diatom  
1175 biology in *Phaeodactylum tricornutum*. *Gene* **406**: 23-35.
- 1176 Stanley JAC. 2007. Whole cell adhesion strength of morphotypes and isolates of  
1177 *Phaeodactylum tricornutum* (Bacillariophyceae). *European Journal of  
1178 Phycology* doi:10.1080/09670260701240863.
- 1179 Taddei L, Stella GR, Rogato A, Bailleul B, Fortunato AE, Annunziata R, Sanges R,  
1180 Thaler M, Lepetit B, Lavaud J et al. 2016. Multisignal control of expression  
1181 of the LHCX protein family in the marine diatom *Phaeodactylum  
1182 tricornutum*. *J Exp Bot* **67**: 3939-3951.
- 1183 Tanaka T, Maeda Y, Veluchamy A, Tanaka M, Abida H, Marechal E, Bowler C, Muto  
1184 M, Sunaga Y, Tanaka M et al. 2015. Oil Accumulation by the Oleaginous  
1185 Diatom *Fistulifera solaris* as Revealed by the Genome and Transcriptome.  
1186 *The Plant cell* **27**: 162-176.
- 1187 Thiel MaG, L. 2005. The ecology of rafting in the marine environment. II. The  
1188 rafting organisms and community. *Oceanography and Marine Biology: An  
1189 Annual Review* **43**: 279-418.
- 1190 Tirichine L, Rastogi A, Bowler C. 2017. Recent progress in diatom genomics and  
1191 epigenomics. *Curr Opin Plant Biol* **36**: 46-55.
- 1192 Vartanian M, Descles J, Quinet M, Douady S, Lopez PJ. 2009. Plasticity and  
1193 robustness of pattern formation in the model diatom *Phaeodactylum  
1194 tricornutum*. *The New phytologist* **182**: 429-442.

- 1195 Veluchamy A, Lin X, Maumus F, Rivarola M, Bhavsar J, Creasy T, O'Brien K,  
1196 Sengamalay NA, Tallon LJ, Smith AD et al. 2013. Insights into the role of  
1197 DNA methylation in diatoms by genome-wide profiling in *Phaeodactylum*  
1198 *tricornutum*. *Nat Commun* **4**.
- 1199 Veluchamy A, Rastogi A, Lin X, Lombard B, Murik O, Thomas Y, Dingli F, Rivarola  
1200 M, Ott S, Liu X et al. 2015. An integrative analysis of post-translational  
1201 histone modifications in the marine diatom *Phaeodactylum tricornutum*.  
1202 *Genome biology* **16**: 102.
- 1203 Wecek K, Hartmann S, Paijmans JL, Taron U, Xenikoudakis G, Cahill JA, Heintzman  
1204 PD, Shapiro B, Baryshnikov G, Bunevich AN et al. 2016. Complex Admixture  
1205 Preceded and Followed the Extinction of Wisent in the Wild. *Mol Biol Evol*  
1206 doi:10.1093/molbev/msw254.
- 1207 Weiguo Li JW. 2011. Influence of light and nitrate assimilation on the growth  
1208 strategy in clonal weed *Eichhornia crassipes*. *Aquatic Ecology*  
1209 doi:10.1007/s10452-010-9318-8.
- 1210 Whitlock MC, McCauley DE. 1999. Indirect measures of gene flow and migration:  
1211 FST not equal to  $1/(4Nm + 1)$ . *Heredity (Edinb)* **82 (Pt 2)**: 117-125.
- 1212 Whittaker KA, Ryneerson TA. 2017. Evidence for environmental and ecological  
1213 selection in a microbe with no geographic limits to gene flow. *Proceedings*  
1214 *of the National Academy of Sciences of the United States of America* **114**:  
1215 2651-2656.
- 1216 Wolf M, Chen S, Song J, Ankenbrand M, Muller T. 2013. Compensatory base  
1217 changes in ITS2 secondary structures correlate with the biological species  
1218 concept despite intragenomic variability in ITS2 sequences--a proof of  
1219 concept. *PloS one* **8**: e66726.
- 1220 Yang Z, Nielsen R, Goldman N, Pedersen AM. 2000. Codon-substitution models for  
1221 heterogeneous selection pressure at amino acid sites. *Genetics* **155**: 431-  
1222 449.
- 1223 Zhang Z, Li J, Zhao XQ, Wang J, Wong GK, Yu J. 2006. KaKs\_Calculator: calculating  
1224 Ka and Ks through model selection and model averaging. *Genomics*  
1225 *Proteomics Bioinformatics* **4**: 259-263.
- 1226
